# Supplementary material for: p-Bromoaryl- and ω-bromoalkyl-VA-PNBs: suitable starting materials for the functionalization of vinylic addition polynorbornenes via palladium-catalyzed cross-coupling reactions
Source: Royal Society of Chemistry journal article supplement (doi:10.1039/c6ra23123c), 2016-01-01

## Supplementary Information

### **p-Bromoaryl- and $\omega$ -Bromoalkyl-VA-PNBs: Suitable Starting Materials for the Functionalization of Vinylic Addition Polynorbornenes via Palladium-Catalyzed Cross-Coupling Reactions**

Sheila Martínez-Arranz, Eduardo Sánchez-Pérez, Jesús A. Molina de la Torre, Ignacio Pérez-Ortega, Ana C. Albéniz.\*

1- Tables with additional experimental data.

2- IR and NMR spectra of the polymers.

1- Tables with additional experimental data.

Table S1. Suzuki reactions on polymer **3**: Screening of reaction conditions to synthesize **5**.<sup>a</sup>

| Entry          | VA-PNB, a/b<br>(mmol Br/g) | <b>3</b> :BPh(OH) <sub>2</sub> : <b>[Pd]</b> <sup>b</sup> | <b>[Pd]</b>                           | Solvent | % Br subst. <sup>c</sup> |
|----------------|----------------------------|-----------------------------------------------------------|---------------------------------------|---------|--------------------------|
| 1 <sup>d</sup> | <b>3</b> , 2.4 (2.1)       | 200:400:1                                                 | [Pd(PPh <sub>3</sub> ) <sub>4</sub> ] | DMF     | 8                        |
| 2 <sup>e</sup> | <b>3</b> , 2.4 (2.1)       | 100:200:1                                                 | [Pd(PPh <sub>3</sub> ) <sub>4</sub> ] | DMF     | 34                       |
| 3 <sup>e</sup> | <b>3</b> , 1.5 (2.56)      | 50:200:1                                                  | [PdCl <sub>2</sub> dppf]              | DMF     | 35                       |
| 4 <sup>f</sup> | <b>3</b> , 1.5 (2.56)      | 50:200:1                                                  | [PdCl <sub>2</sub> dppf]              | Toluene | 90                       |
| 5 <sup>f</sup> | <b>3</b> , 1.5 (2.56)      | 100:200:1                                                 | [PdCl <sub>2</sub> dppf]              | Toluene | 94                       |
| 6 <sup>f</sup> | <b>3</b> , 1.5 (2.56)      | 100:200:1                                                 | [PdCl <sub>2</sub> dppf]              | Dioxane | 65                       |

a) The reactions were carried out at 90 °C for 48 h unless otherwise noted; K<sub>2</sub>CO<sub>3</sub> was used as base. b) Molar ratio of reagents. c) Determined by quantitative analyses of the bromine content in the polymer product. d) 120 °C for 18 h. e) 120 °C for 48 h. f) 110 °C for 48 h.

Table S2. Residual palladium content of some polymers before and after the removal procedures tried.

| Entry | Polymer, residual Pd                 | Removal method                                                                                | Residual Pd after removal |
|-------|--------------------------------------|-----------------------------------------------------------------------------------------------|---------------------------|
| 1     | <b>6</b> , <sup>a</sup> 1.19 mg Pd/g | 4-CF <sub>3</sub> -C <sub>6</sub> H <sub>4</sub> I, toluene, reflux, 24 h                     | 1 mg Pd/g                 |
| 2     | <b>6</b> , <sup>a</sup> 1.6 mg Pd/g  | 4-CF <sub>3</sub> -C <sub>6</sub> H <sub>4</sub> I + PPh <sub>3</sub> , toluene, reflux, 24 h | 0.8 mg Pd/g               |
| 3     | <b>20</b> , <sup>b</sup> 4.6 mg Pd/g | N,N-dimethyl-2-phenyldiazene-carbothioamide, toluene, reflux, 24 h                            | 0.47 mg Pd/g              |
| 4     | <b>7</b> , <sup>c</sup> 9.8 mg Pd/g  | N,N-dimethyl-2-phenyldiazene-carbothioamide, toluene, reflux, 24 h                            | 1.47 mg Pd/g              |

a) Method A, Table 2; 1% mol Pd; b) 5% mol Pd; c) Method B, Table 2; 5% mol Pd.

2- IR and MAS-NMR spectra of the polymers.

VA-PNBC<sub>6</sub>H<sub>4</sub>Br (**2**) <sup>1</sup>H NMR (CDCl<sub>3</sub>)

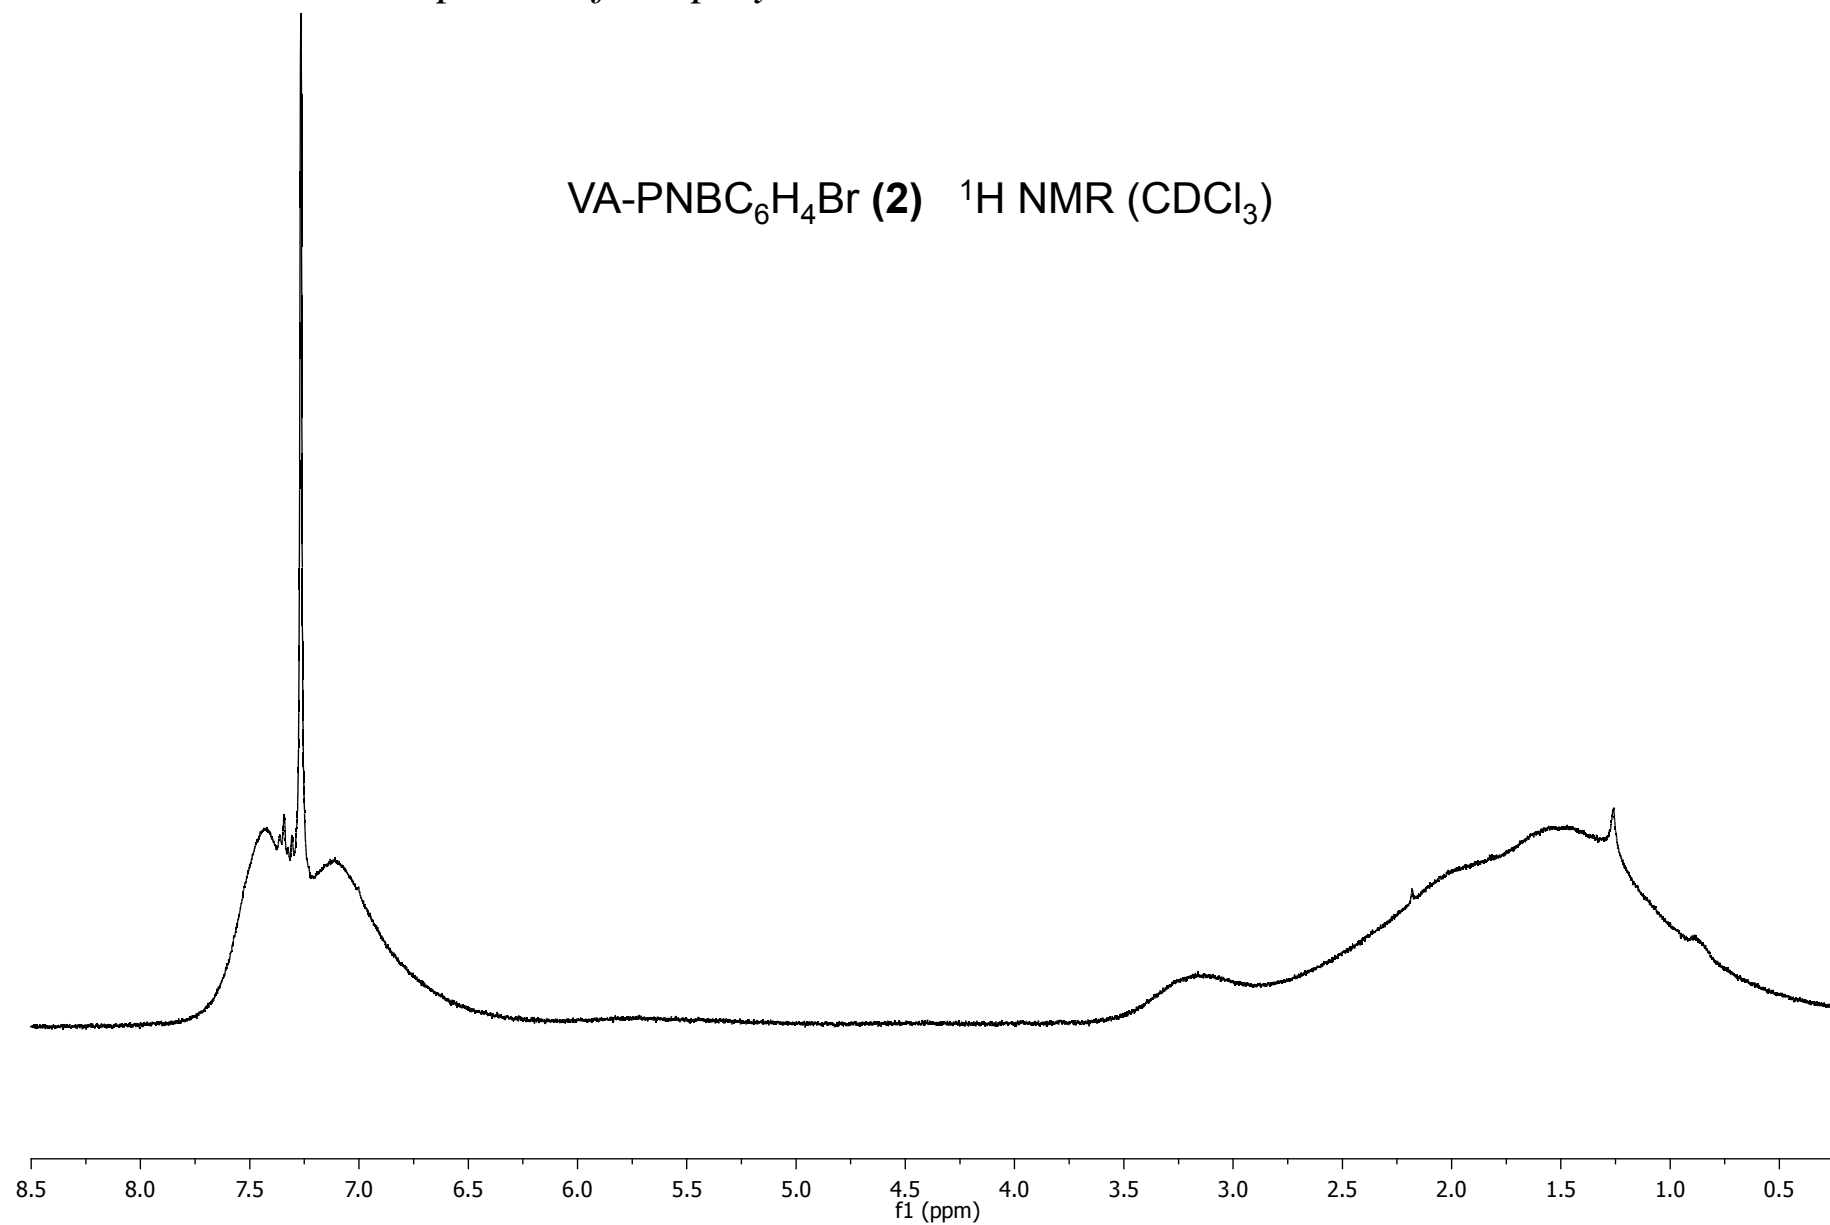

VA-PNBC<sub>6</sub>H<sub>4</sub>Br (**2**) <sup>13</sup>C {<sup>1</sup>H} NMR (CDCl<sub>3</sub>)

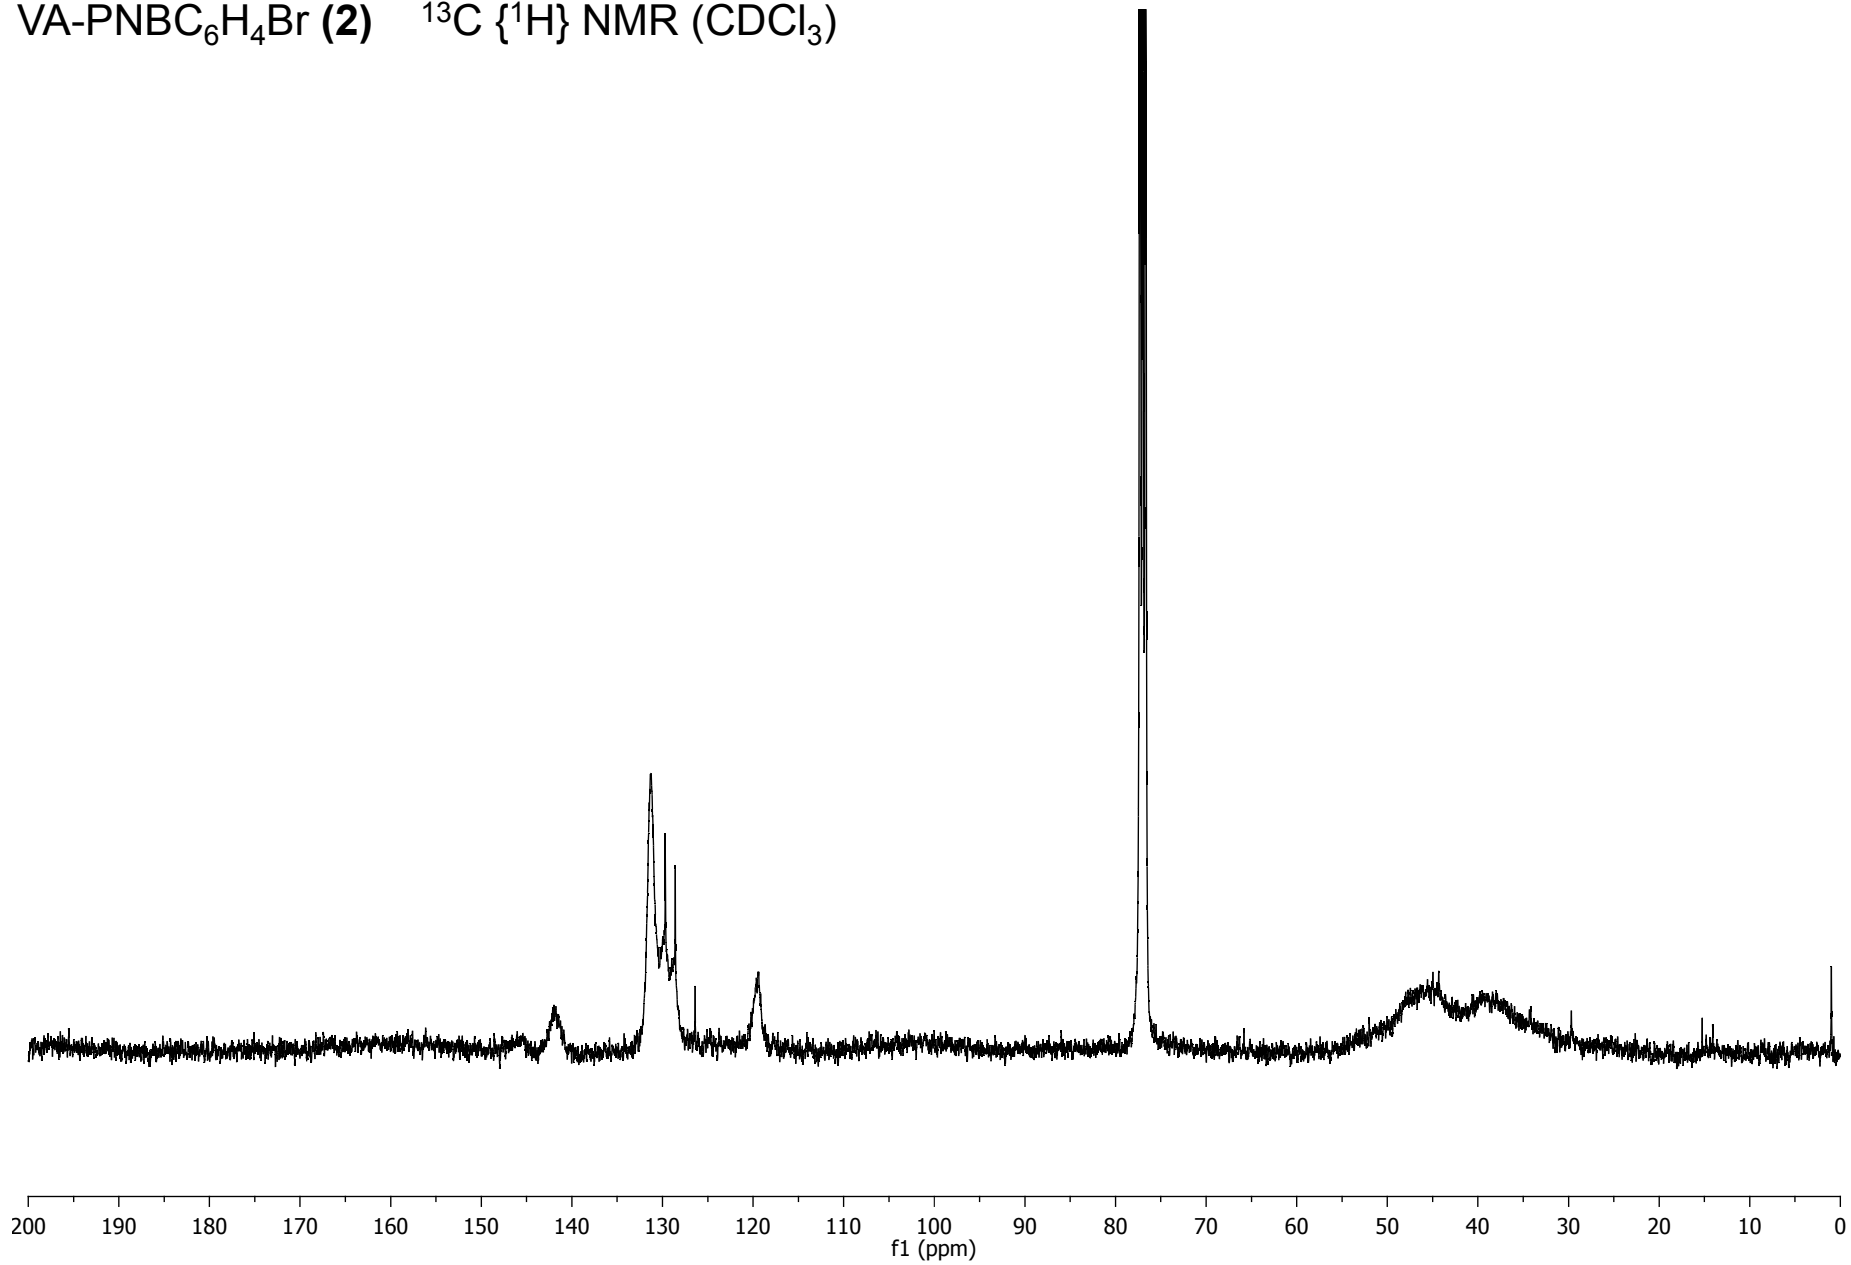

VA-PNBC<sub>6</sub>H<sub>4</sub>Br (2) IR

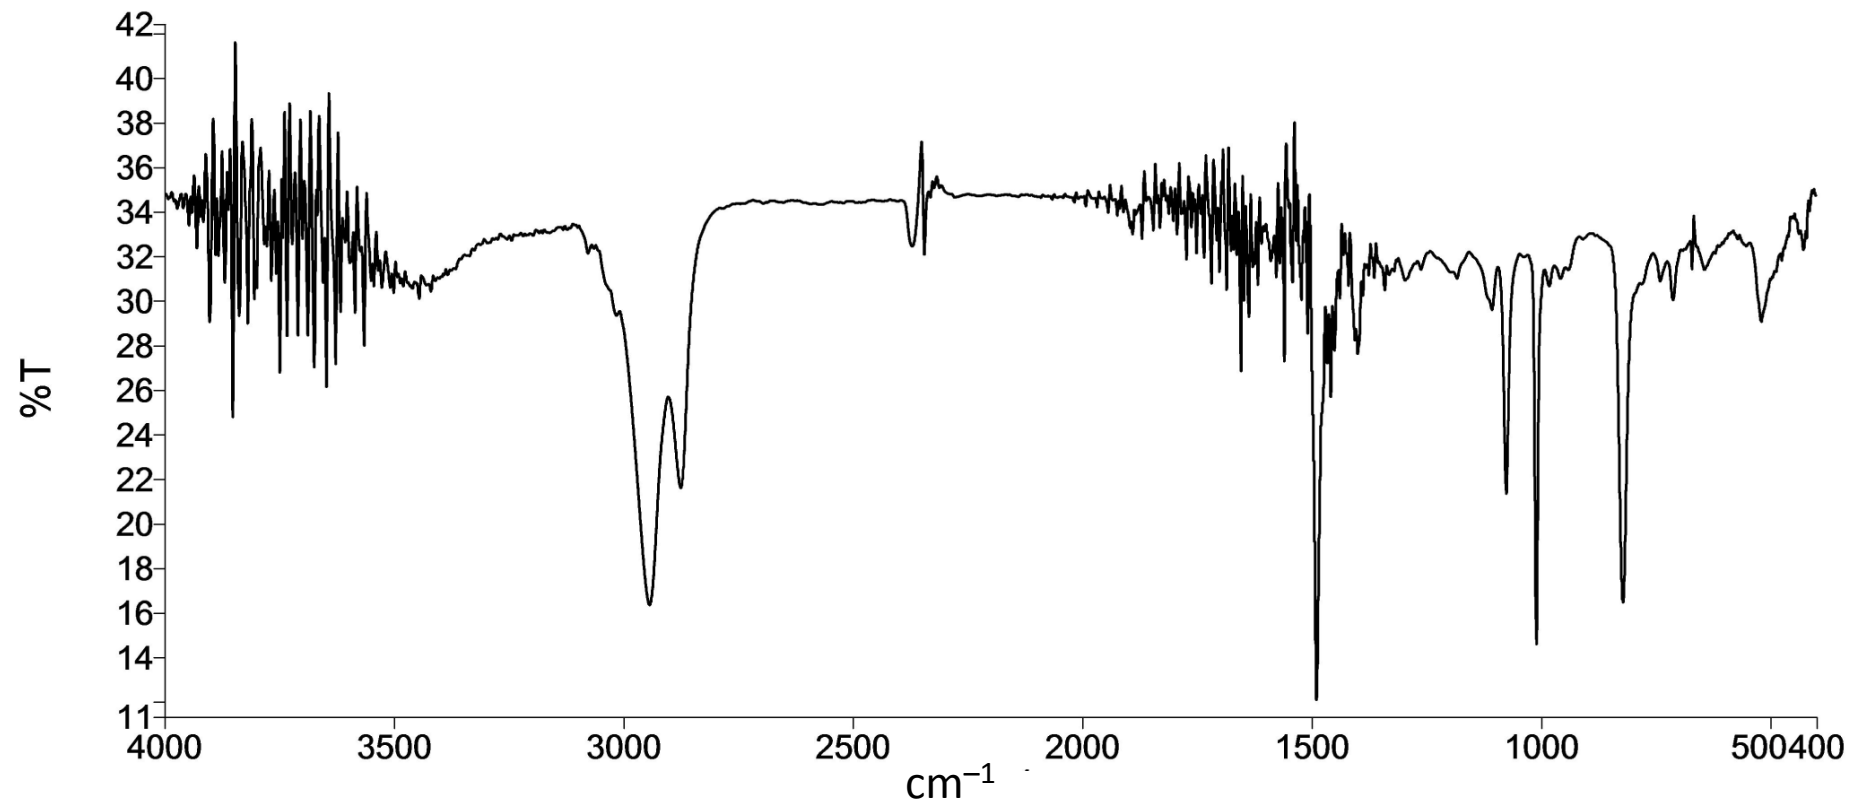

VA-PNBNBC<sub>6</sub>H<sub>4</sub>Br (**3**) (a/b = 1.8) <sup>1</sup>H NMR (CDCl<sub>3</sub>)

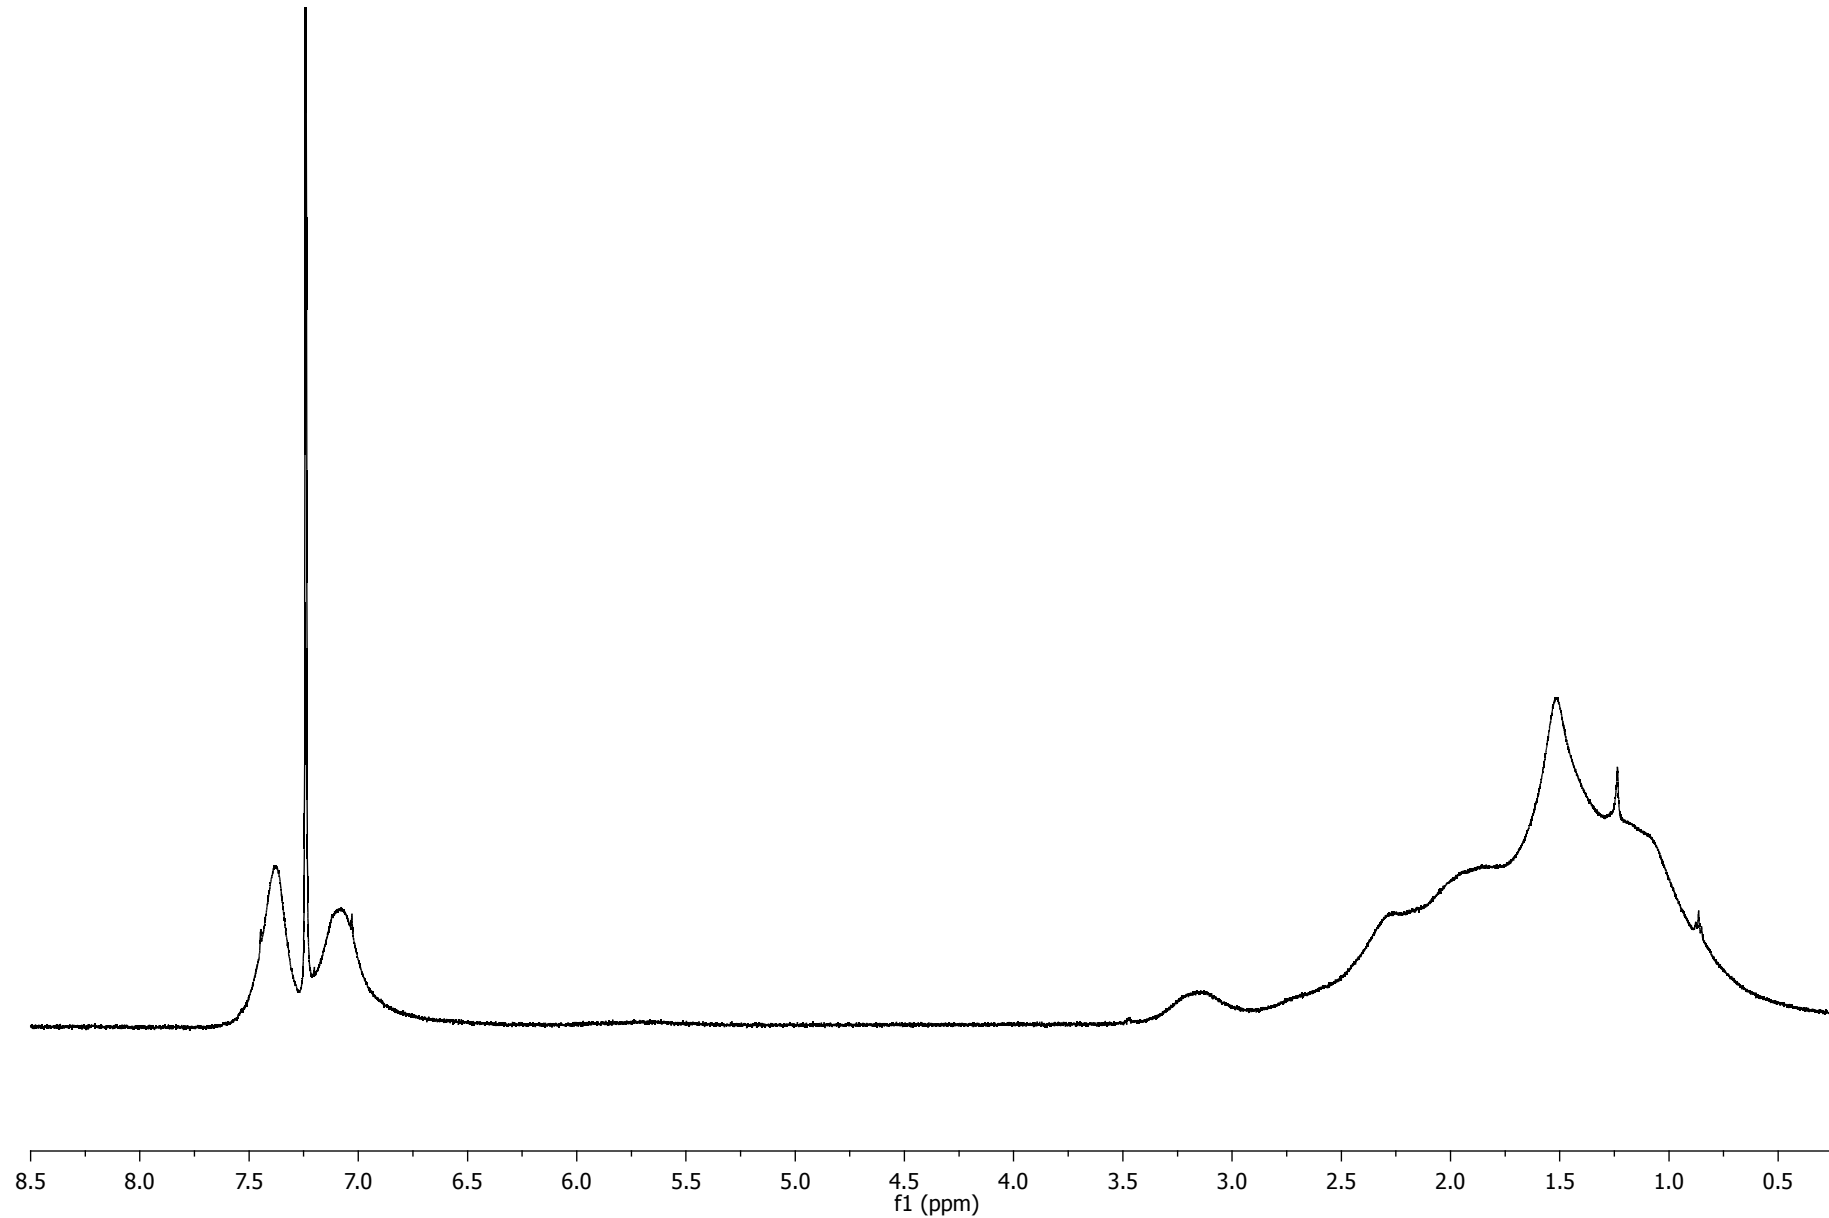

VA-PNBNBC<sub>6</sub>H<sub>4</sub>Br (**3**) (a/b = 1.8) <sup>13</sup>C {<sup>1</sup>H} NMR (CDCl<sub>3</sub>)

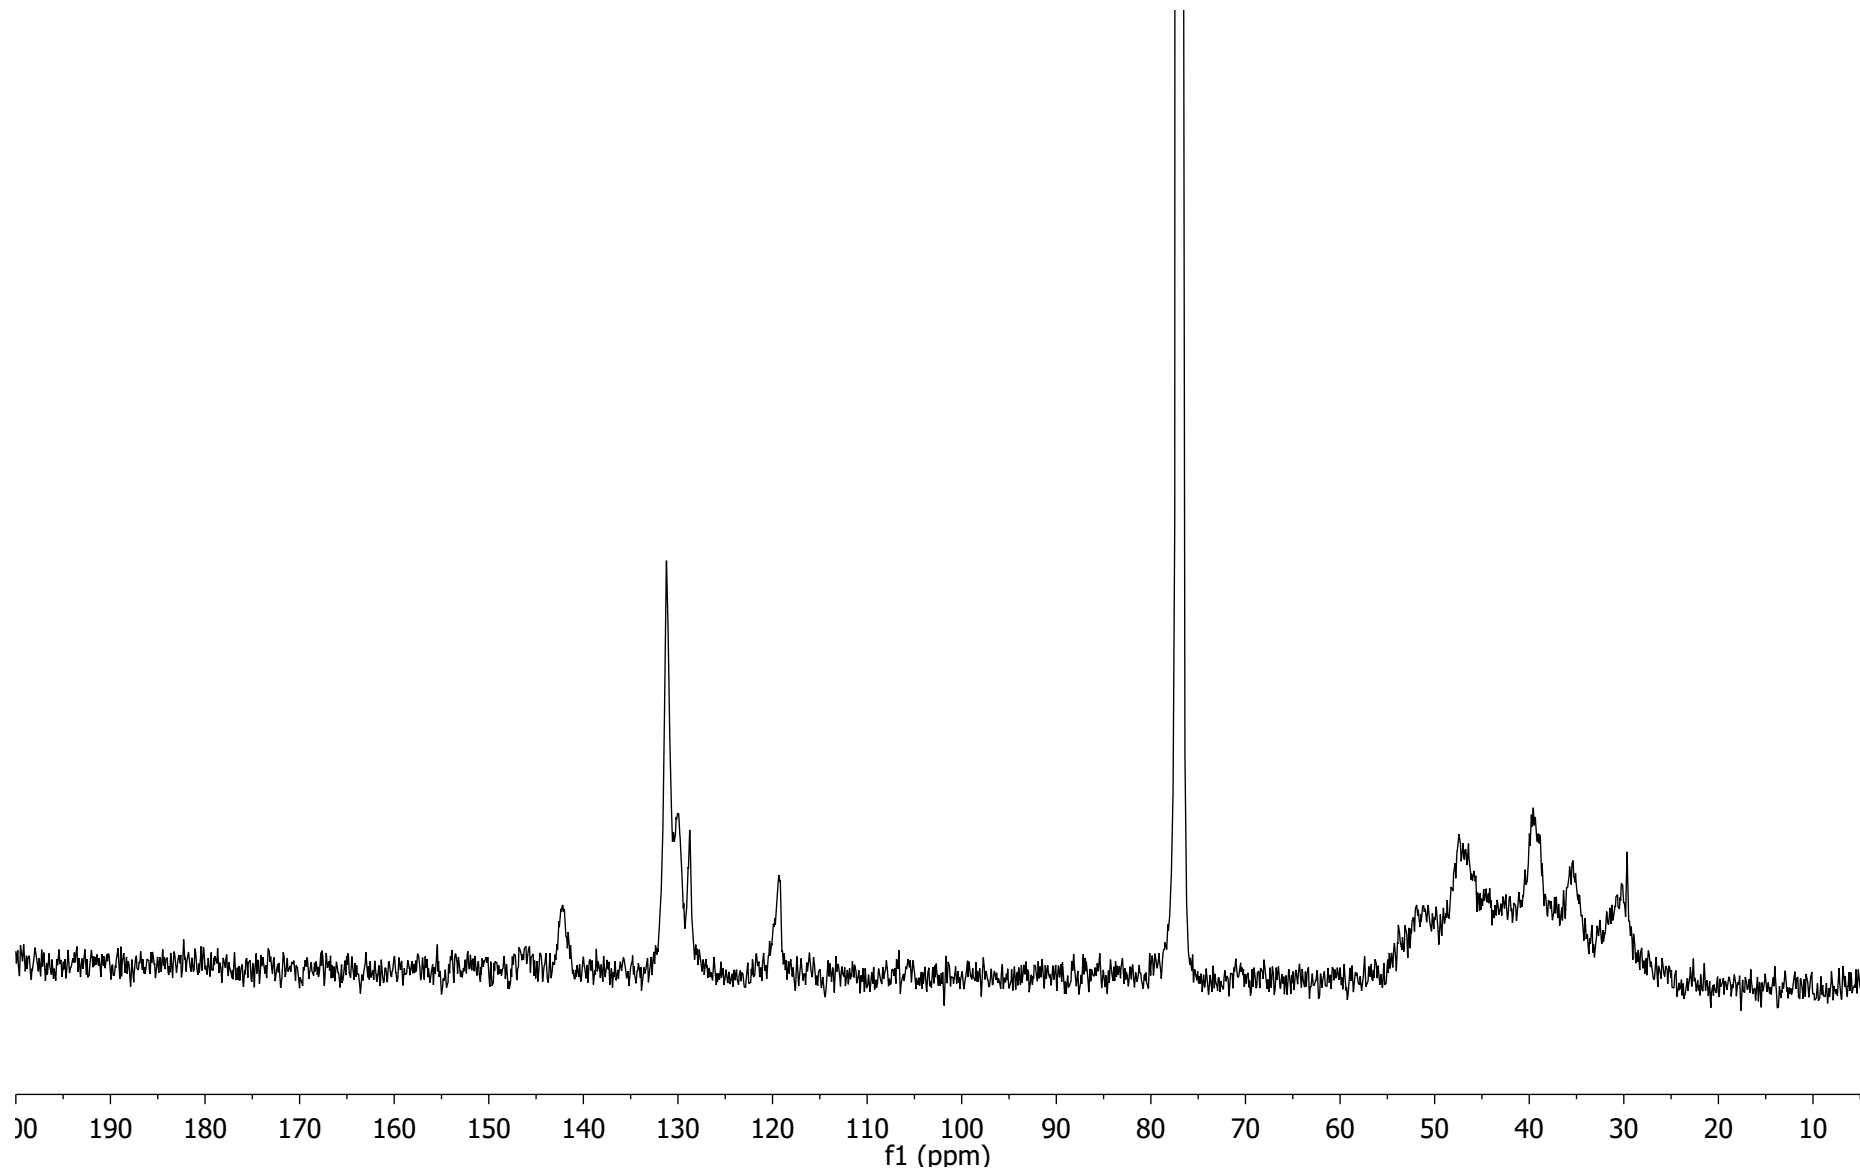



VA-PNBNBC<sub>6</sub>H<sub>4</sub>Br (**3**) (a/b = 1.8) IR

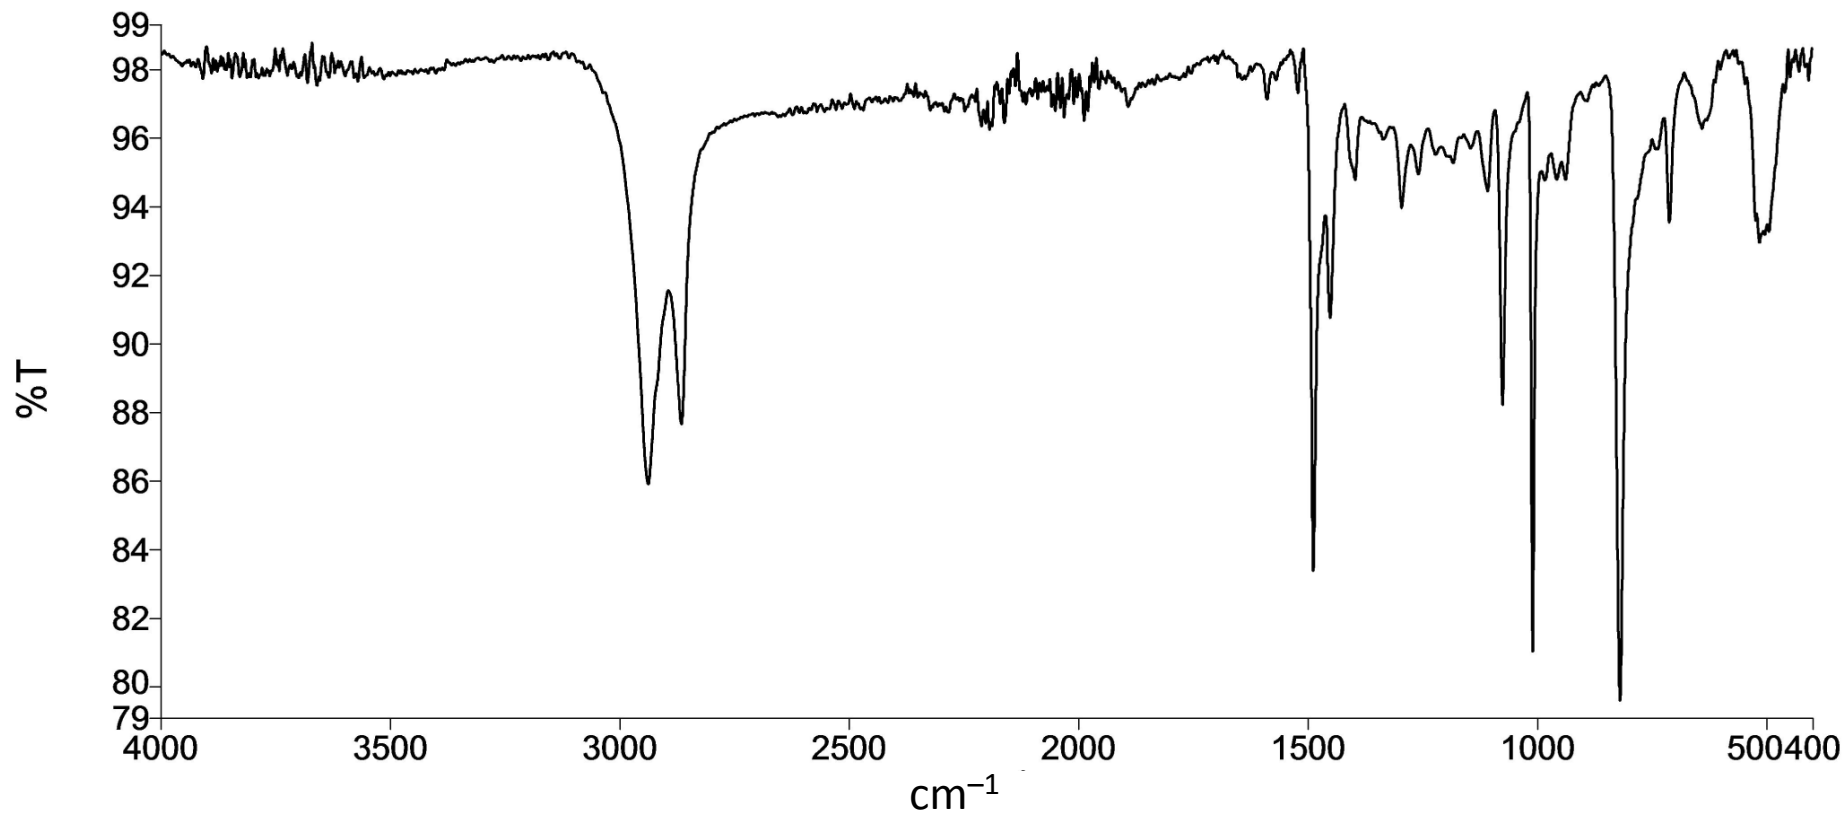

[VA-PNBNBC<sub>6</sub>H<sub>4</sub>-PdBr(PPh<sub>3</sub>)<sub>2</sub>] (**4**) <sup>13</sup>C CP-MAS NMR

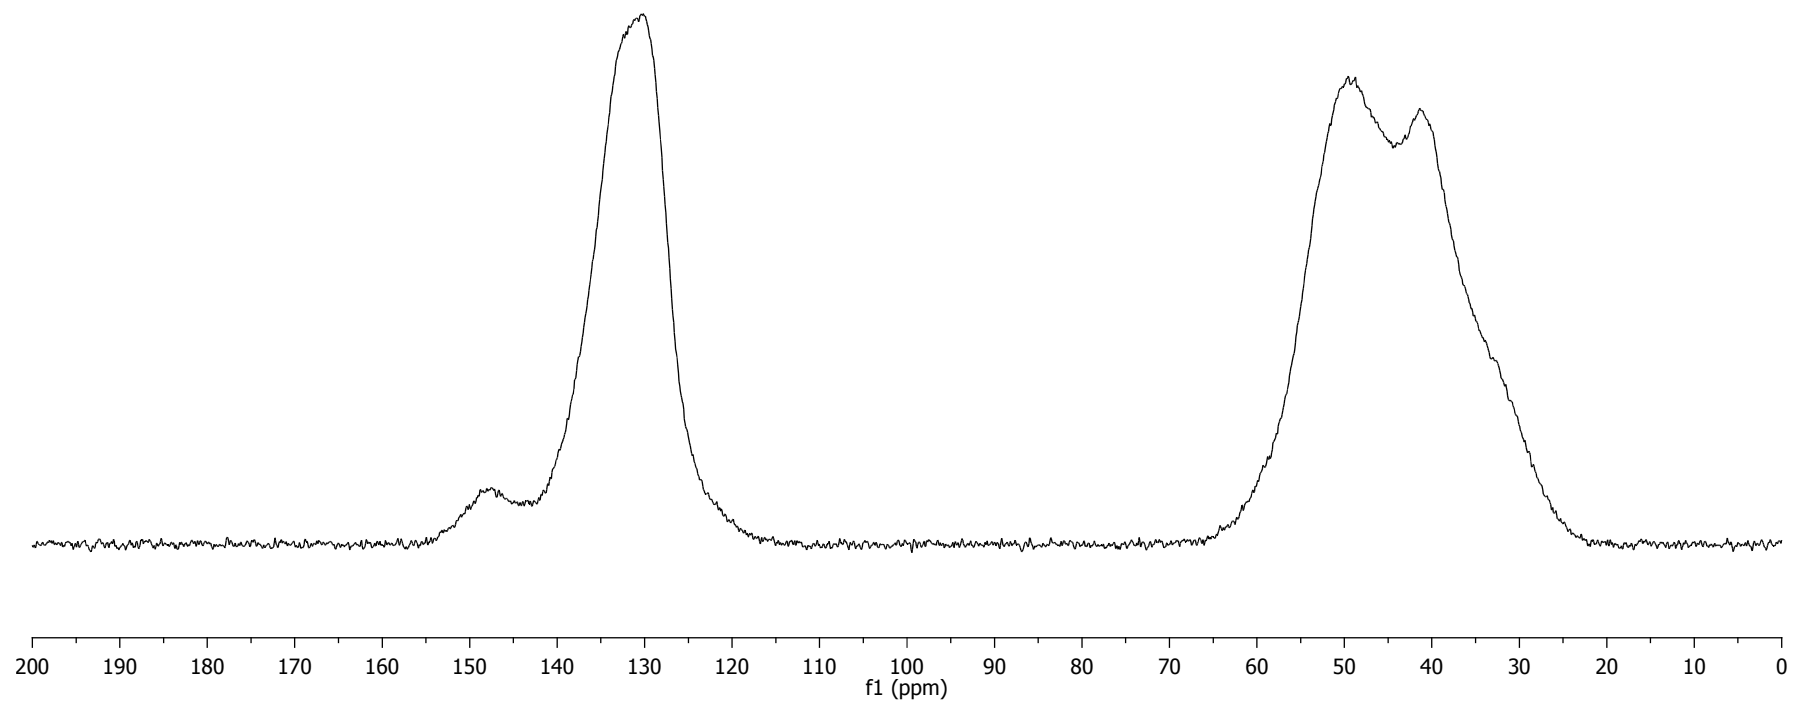

[VA-PNBNBC<sub>6</sub>H<sub>4</sub>-PdBr(PPh<sub>3</sub>)<sub>2</sub>] (**4**) <sup>31</sup>P MAS NMR

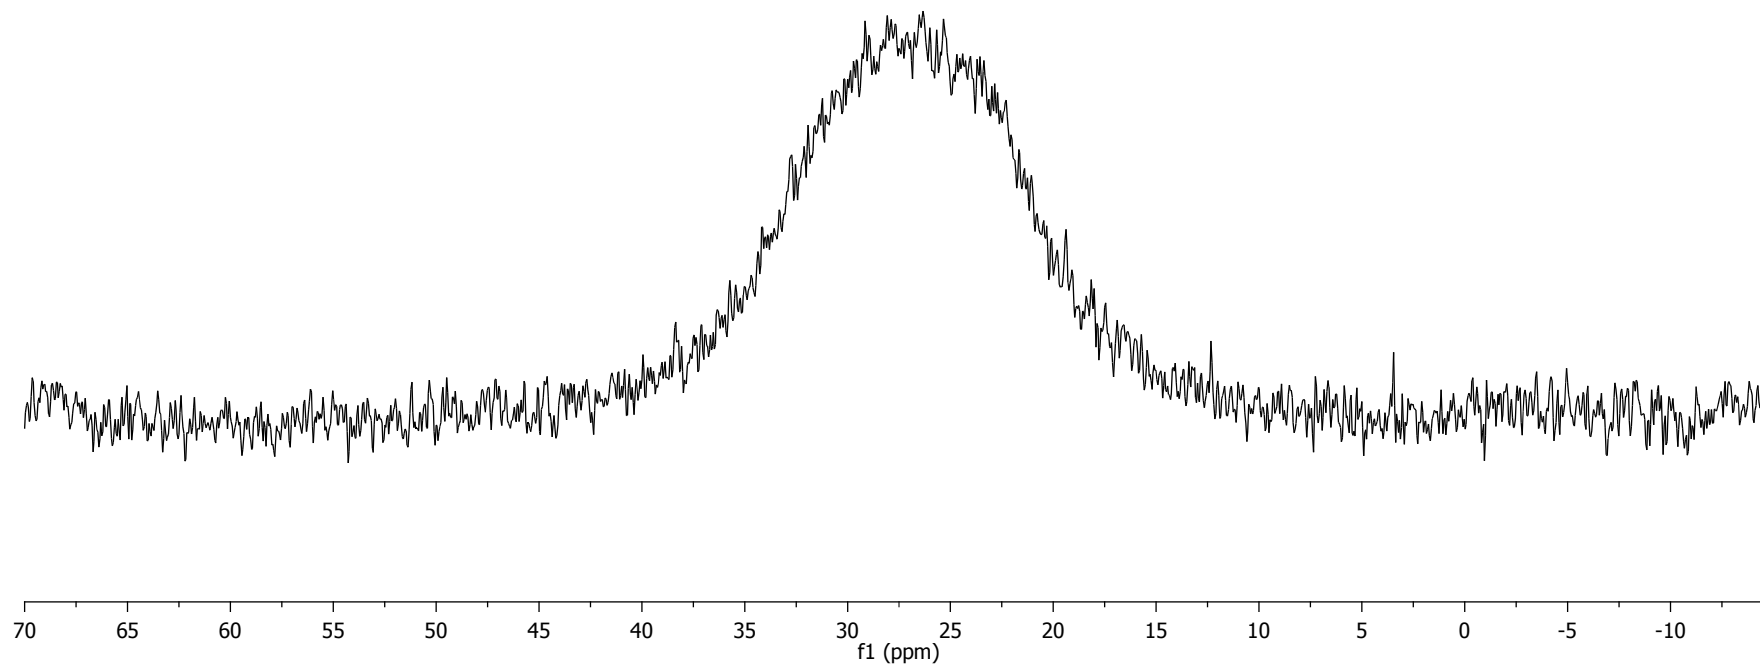

[VA-PNBNBC<sub>6</sub>H<sub>4</sub>-PdBr(PPh<sub>3</sub>)<sub>2</sub>] (**4**) IR

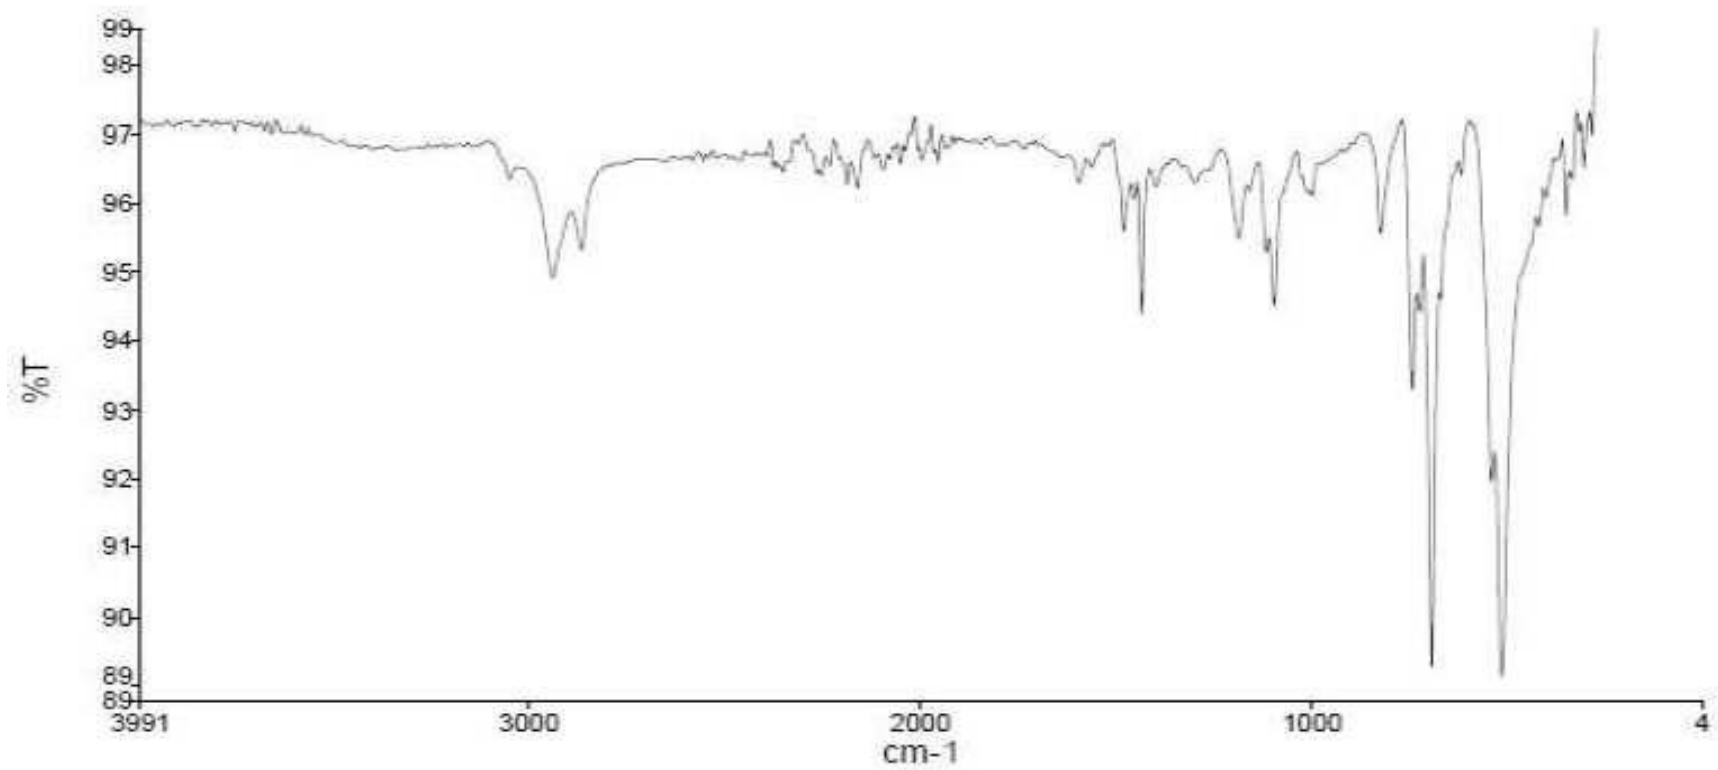

VA-PNBNBC<sub>6</sub>H<sub>4</sub>-Ph (5) <sup>13</sup>C CP-MAS NMR

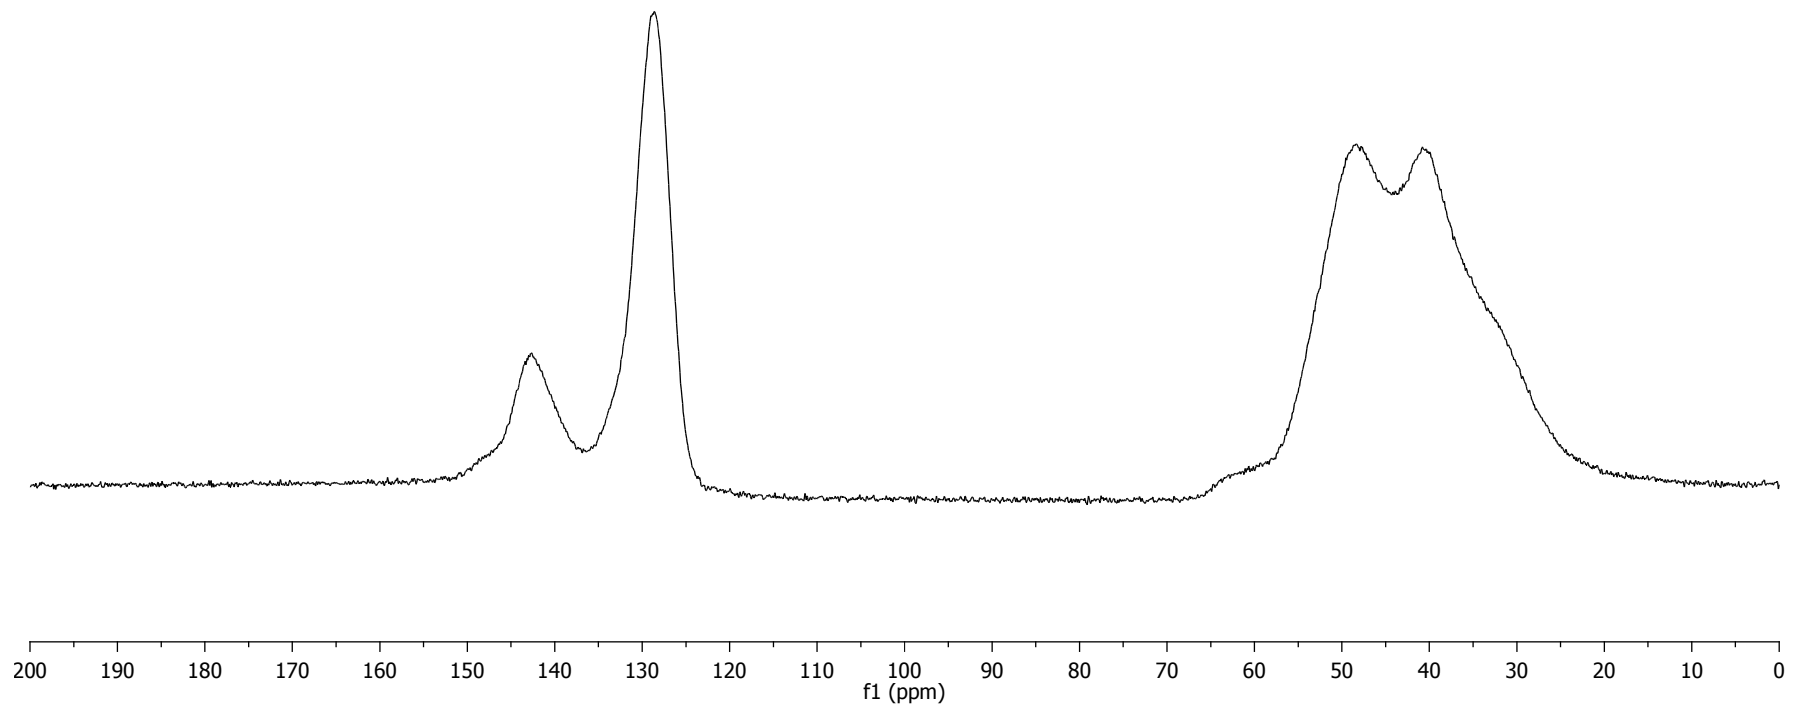

VA-PNBNBC<sub>6</sub>H<sub>4</sub>-Ph (5) IR

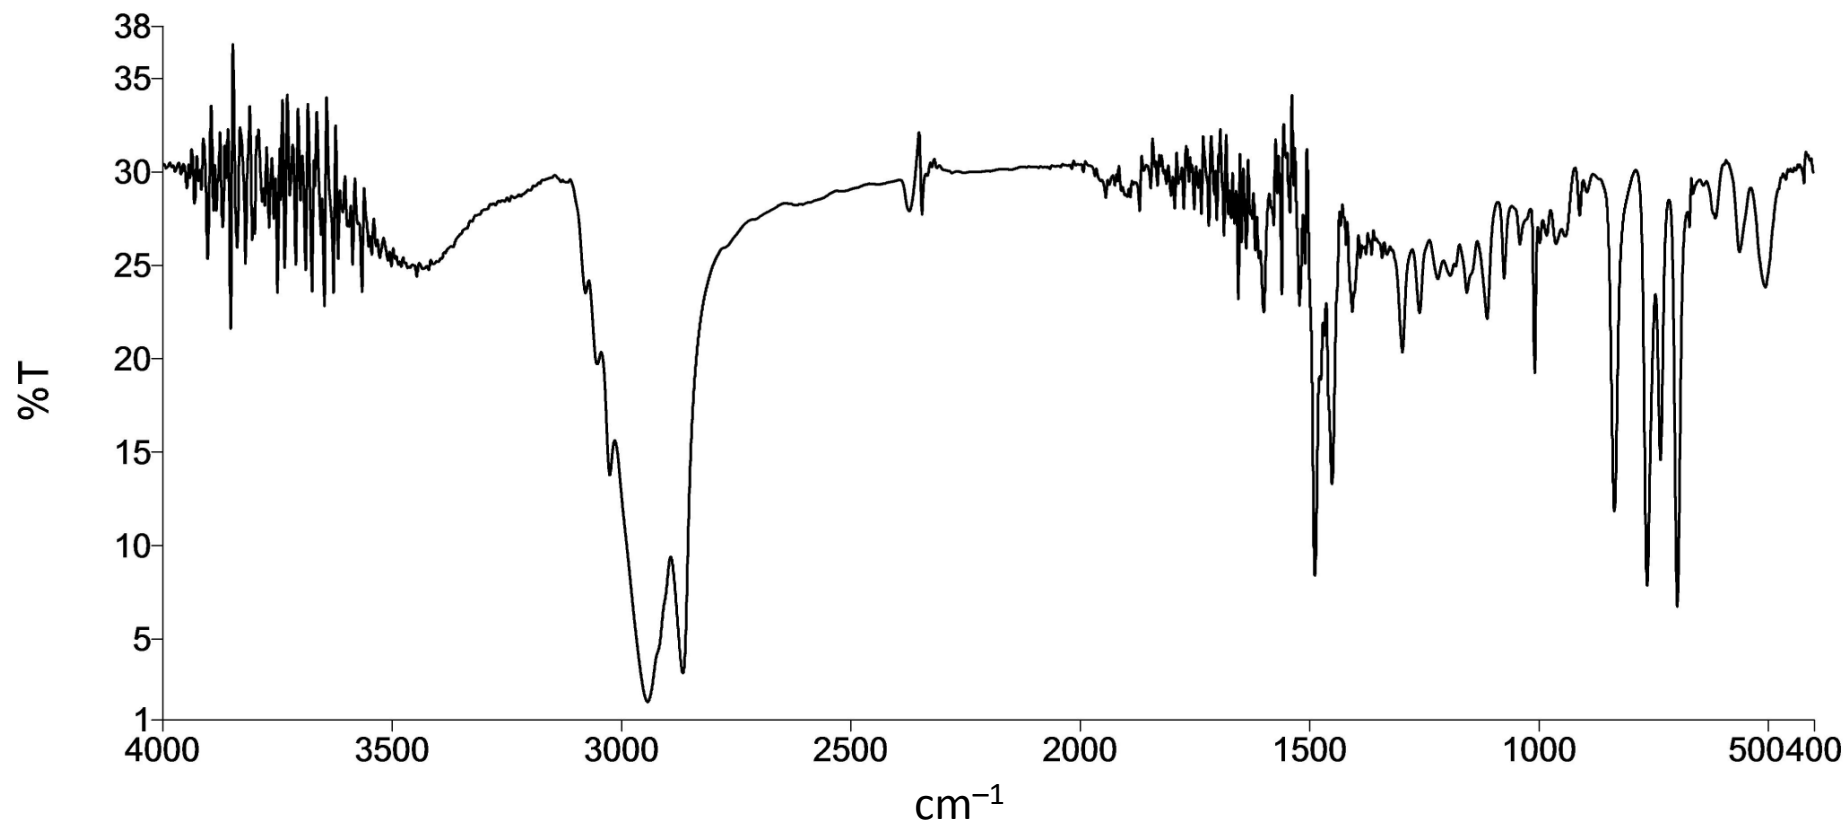

VA-PNBNBC<sub>6</sub>H<sub>4</sub>-C<sub>6</sub>H<sub>4</sub>-4-CF<sub>3</sub> (**6**) <sup>13</sup>C CP-MAS NMR

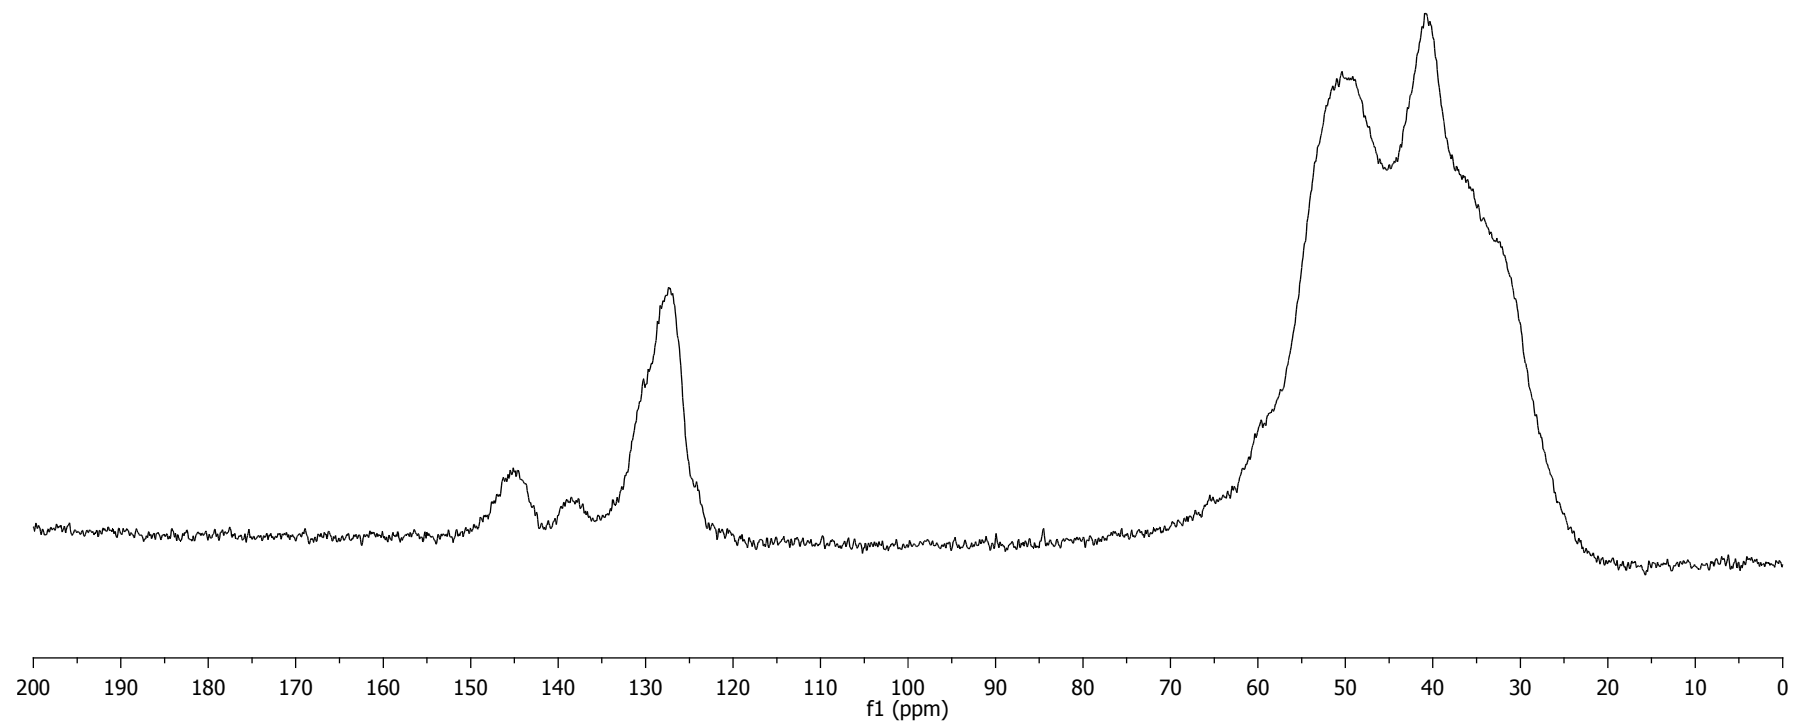

VA-PNBNBC<sub>6</sub>H<sub>4</sub>-C<sub>6</sub>H<sub>4</sub>-4-CF<sub>3</sub> (**6**) <sup>19</sup>F MAS NMR

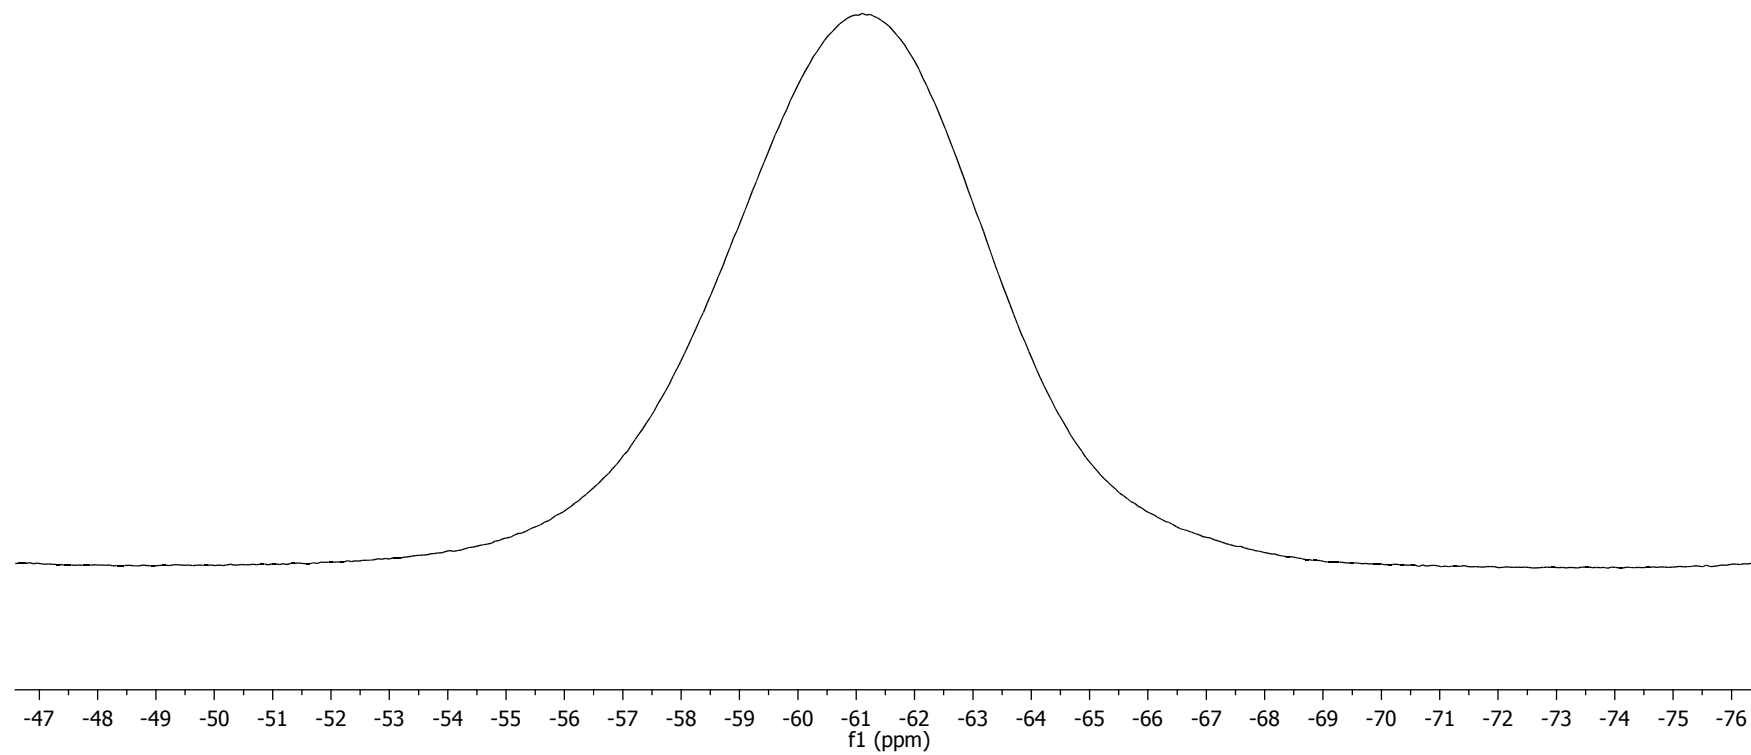



VA-PNBNBC<sub>6</sub>H<sub>4</sub>-C<sub>6</sub>H<sub>4</sub>-4-CF<sub>3</sub> (**6**) IR

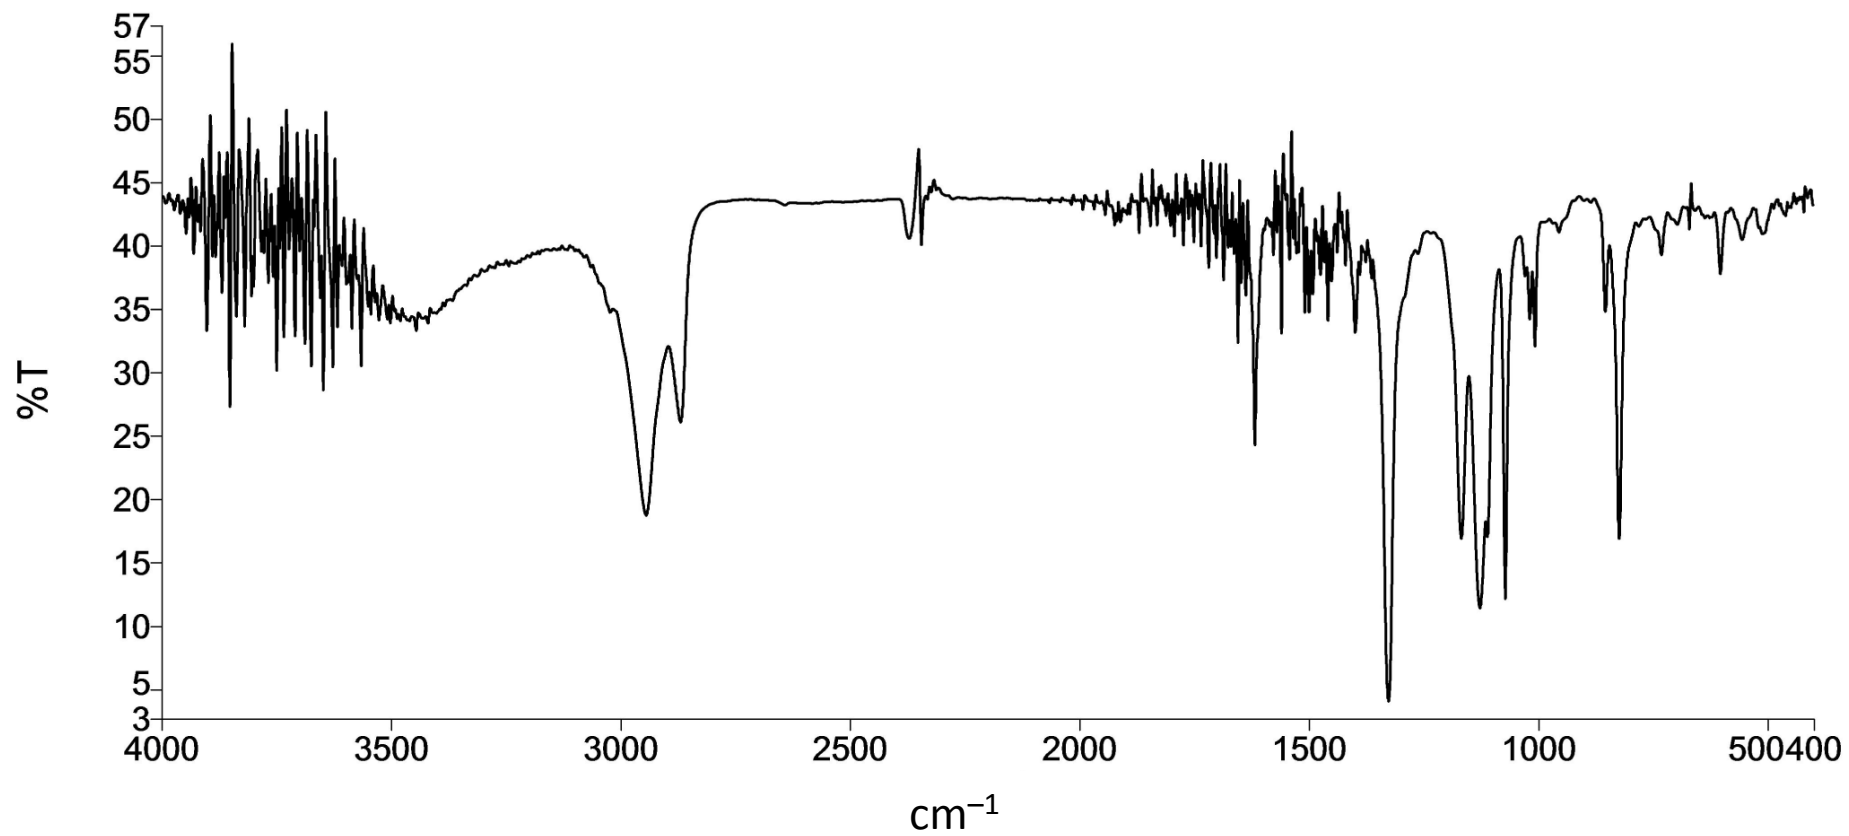

VA-PNBNBC<sub>6</sub>H<sub>4</sub>-C<sub>6</sub>H<sub>4</sub>-4-OMe (**7**) <sup>13</sup>C CP-MAS NMR

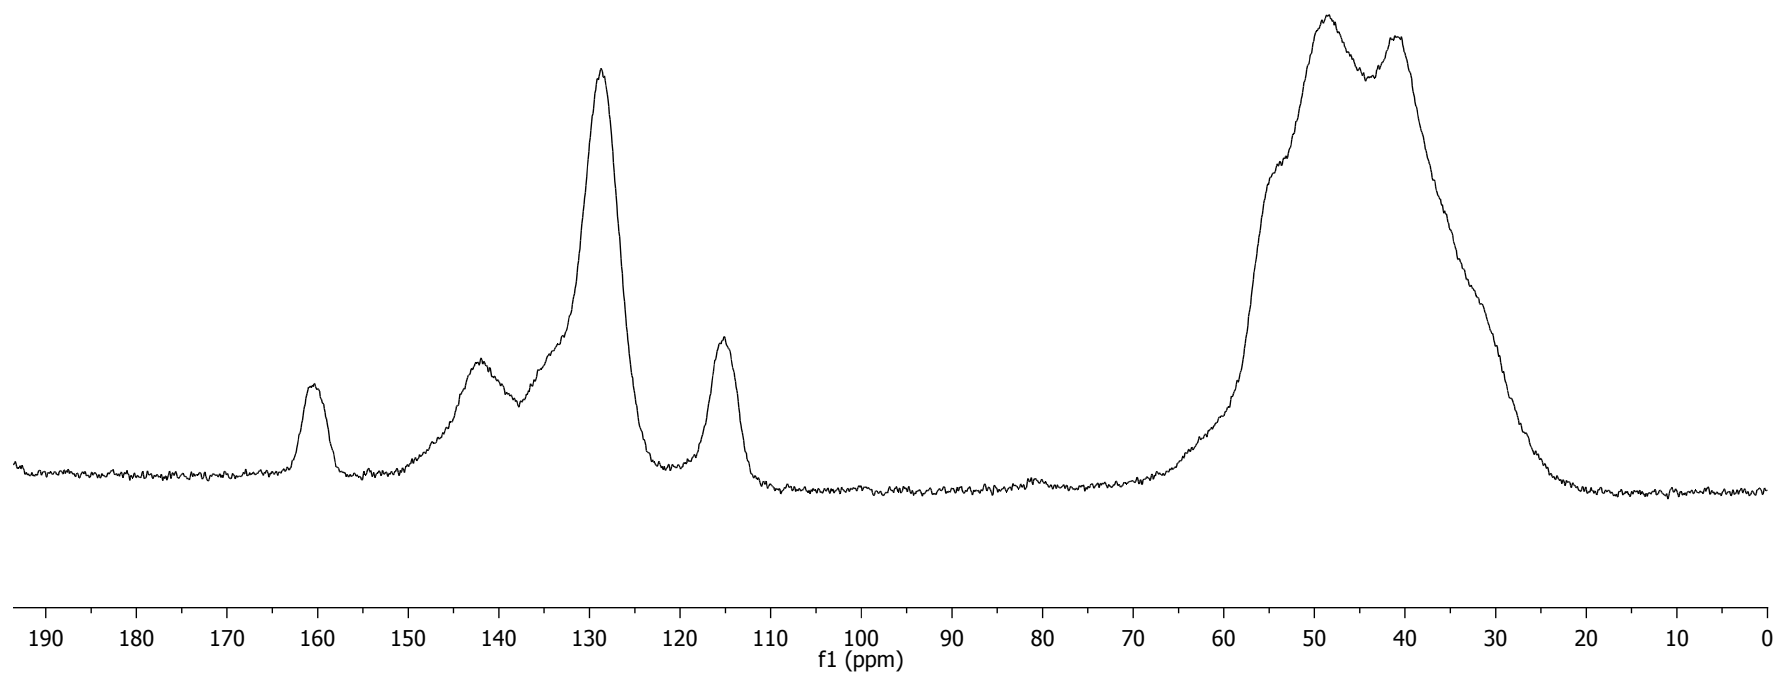

VA-PNBNBC<sub>6</sub>H<sub>4</sub>-C<sub>6</sub>H<sub>4</sub>-4-OMe (7) IR

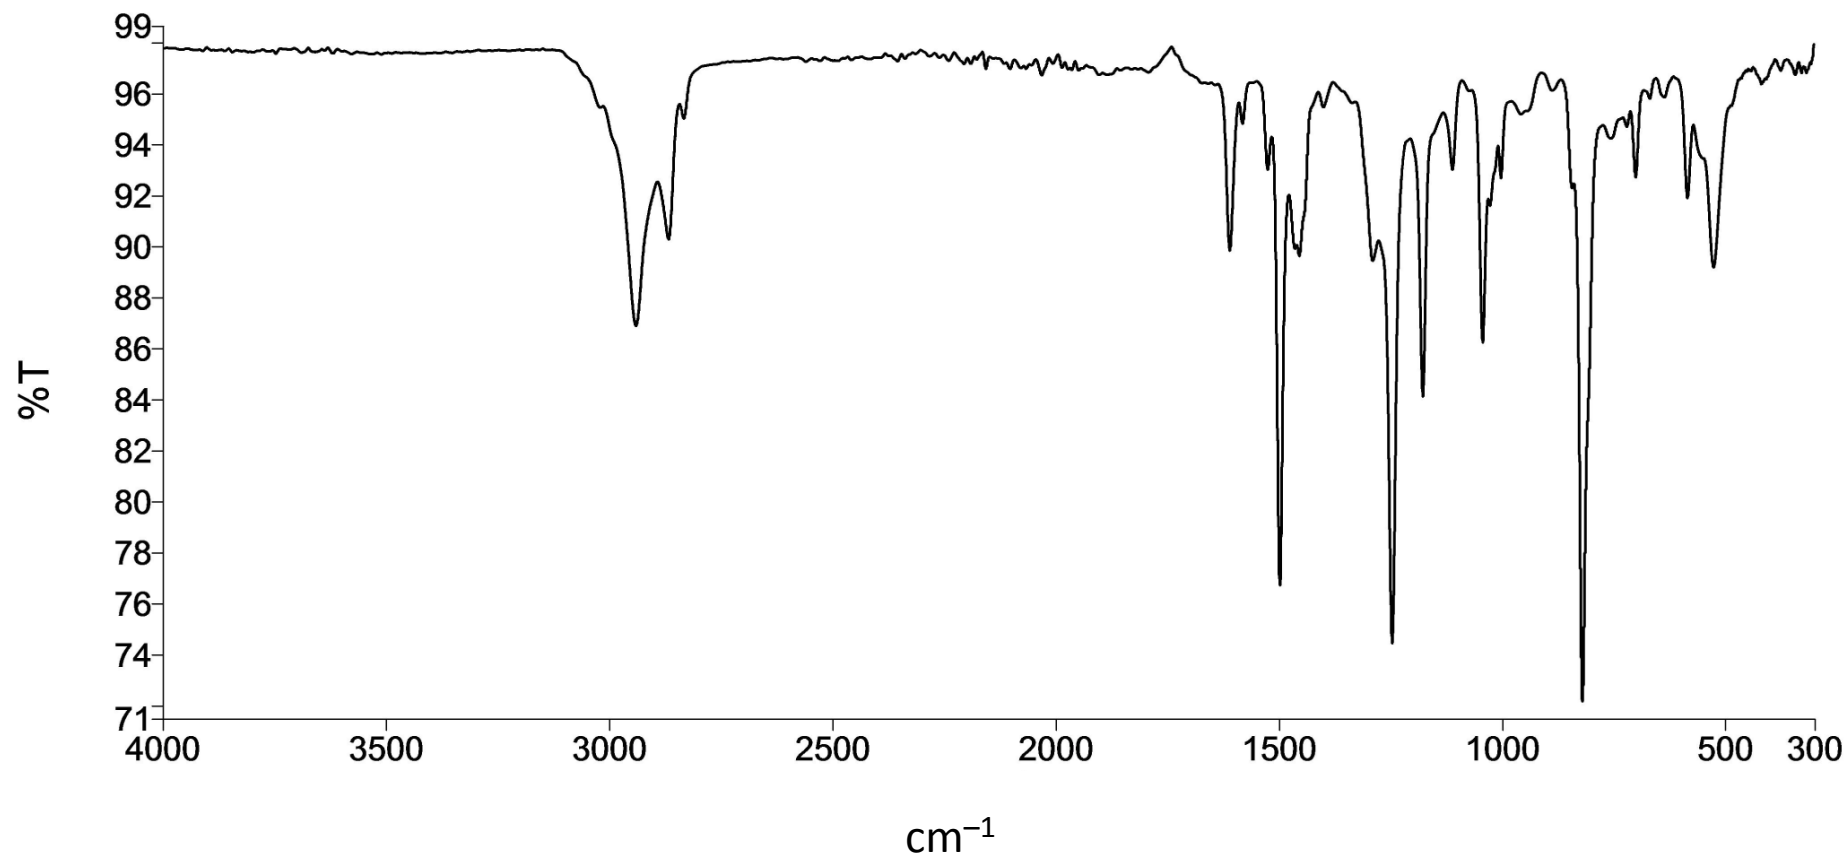

VA-PNBNBC<sub>6</sub>H<sub>4</sub>-C<sub>6</sub>H<sub>3</sub>-2-Me-4-OMe (**8**) <sup>13</sup>C CP-MAS NMR

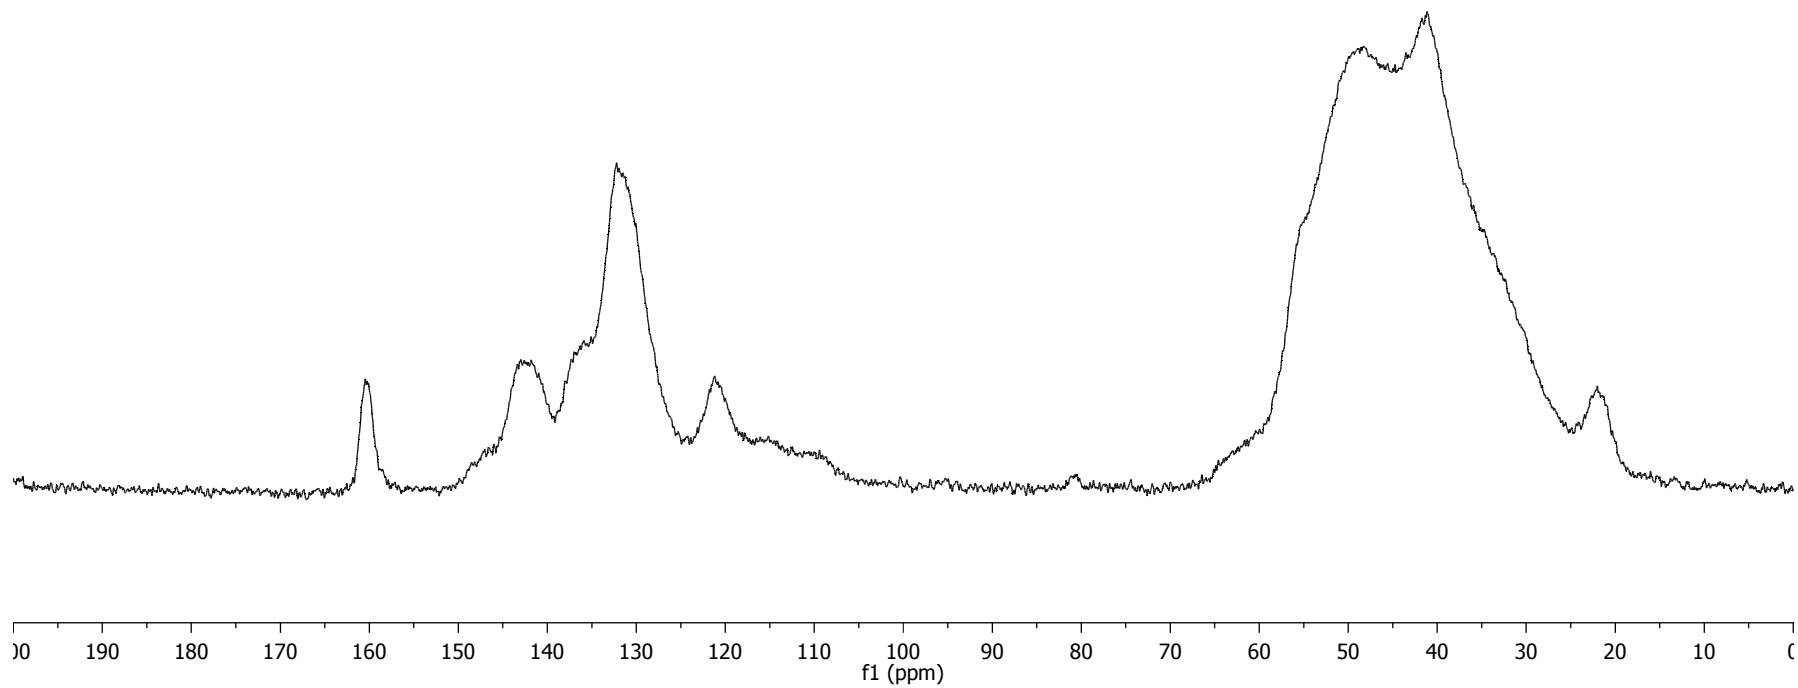

VA-PNBNBC<sub>6</sub>H<sub>4</sub>-C<sub>6</sub>H<sub>3</sub>-2-Me-4-OMe (8) IR

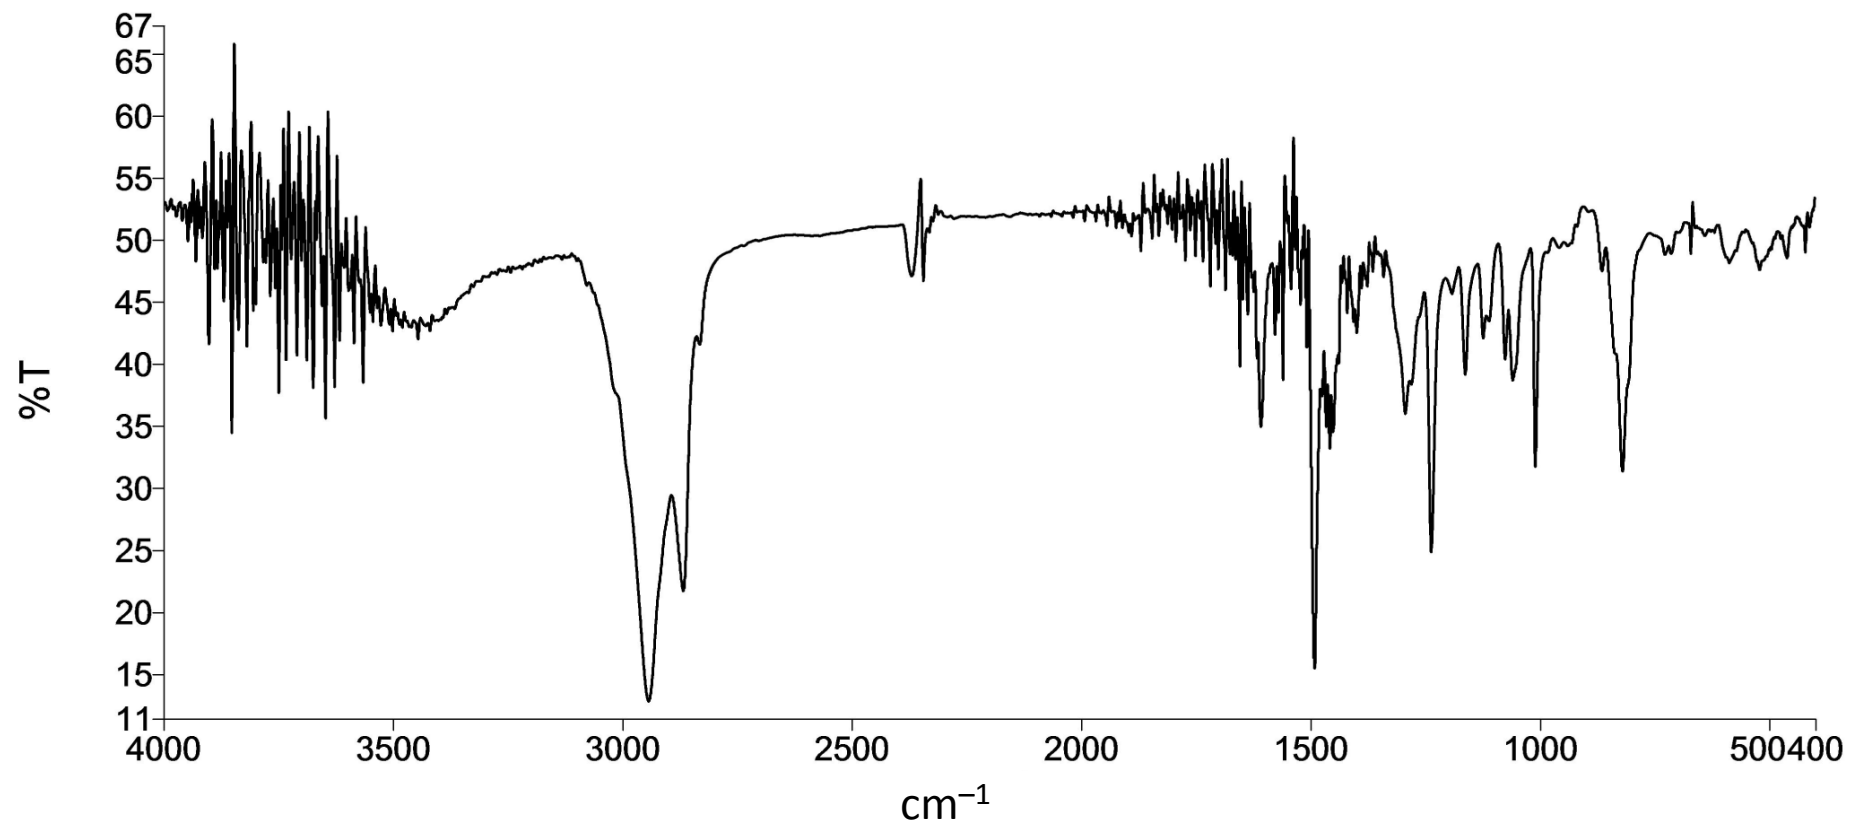

VA-PNBNBC<sub>6</sub>H<sub>4</sub>-CH<sub>2</sub>C(O)CH<sub>3</sub> (**9**) <sup>13</sup>C CP-MAS NMR

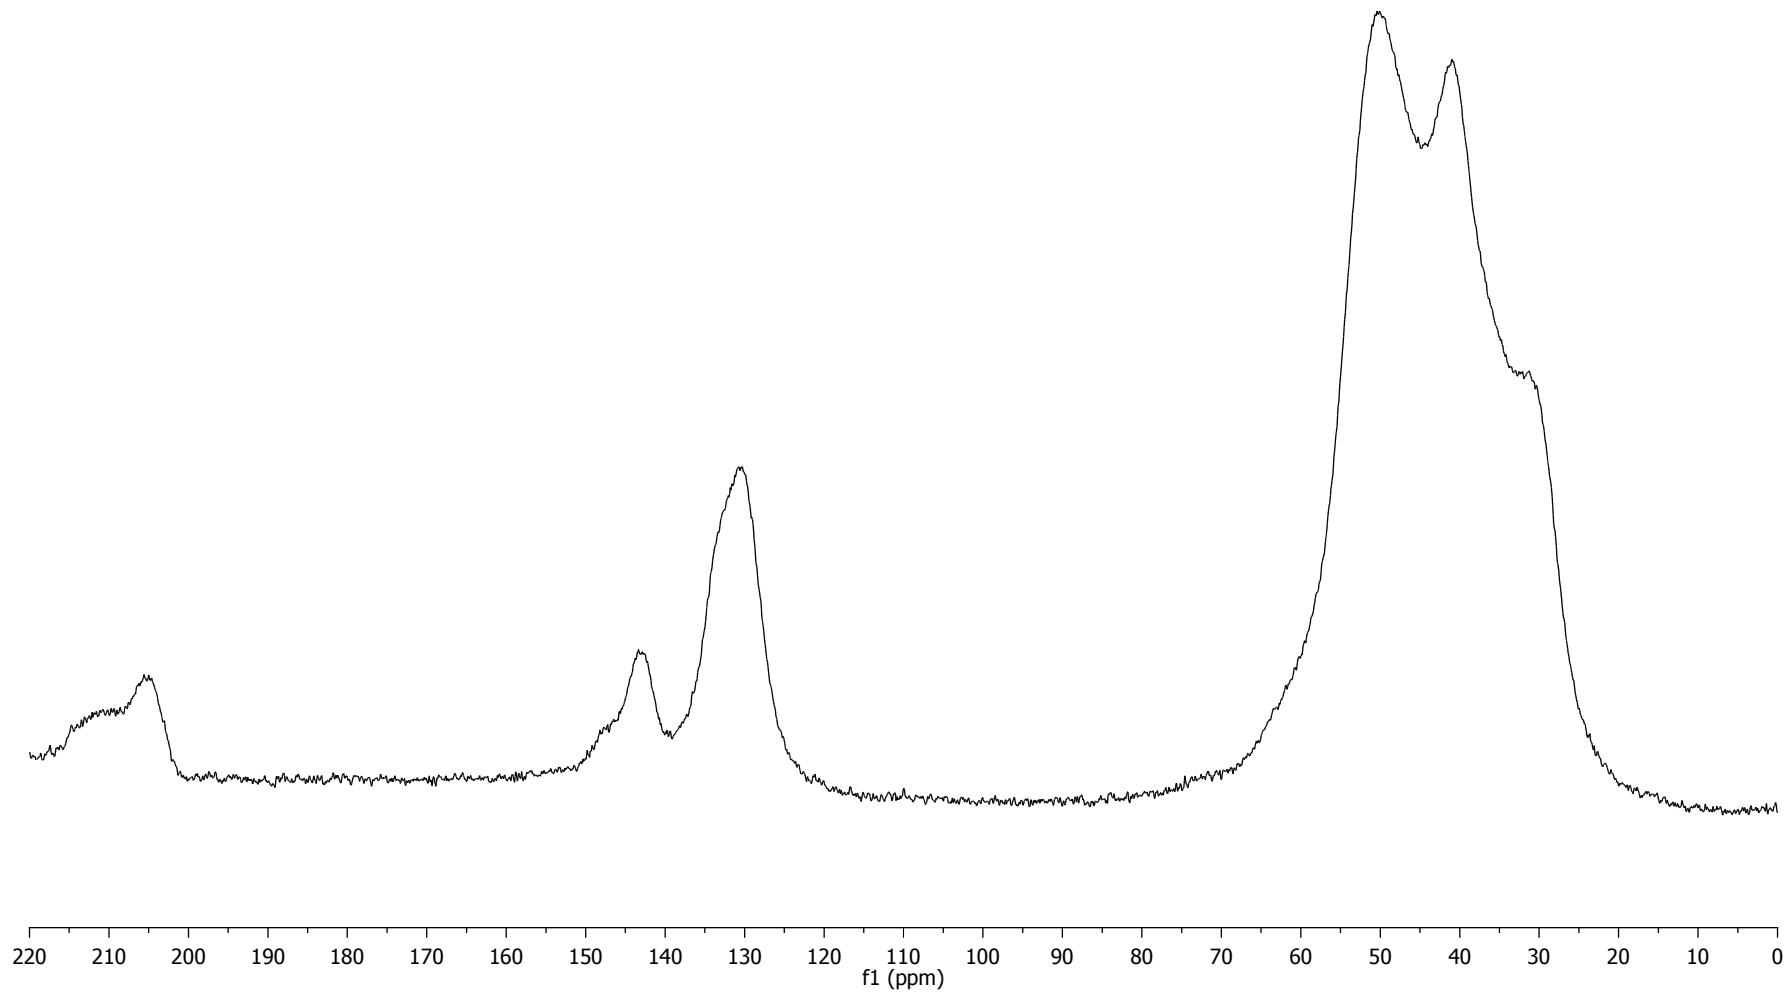

VA-PNBNBC<sub>6</sub>H<sub>4</sub>-CH<sub>2</sub>C(O)CH<sub>3</sub> (**9**) IR

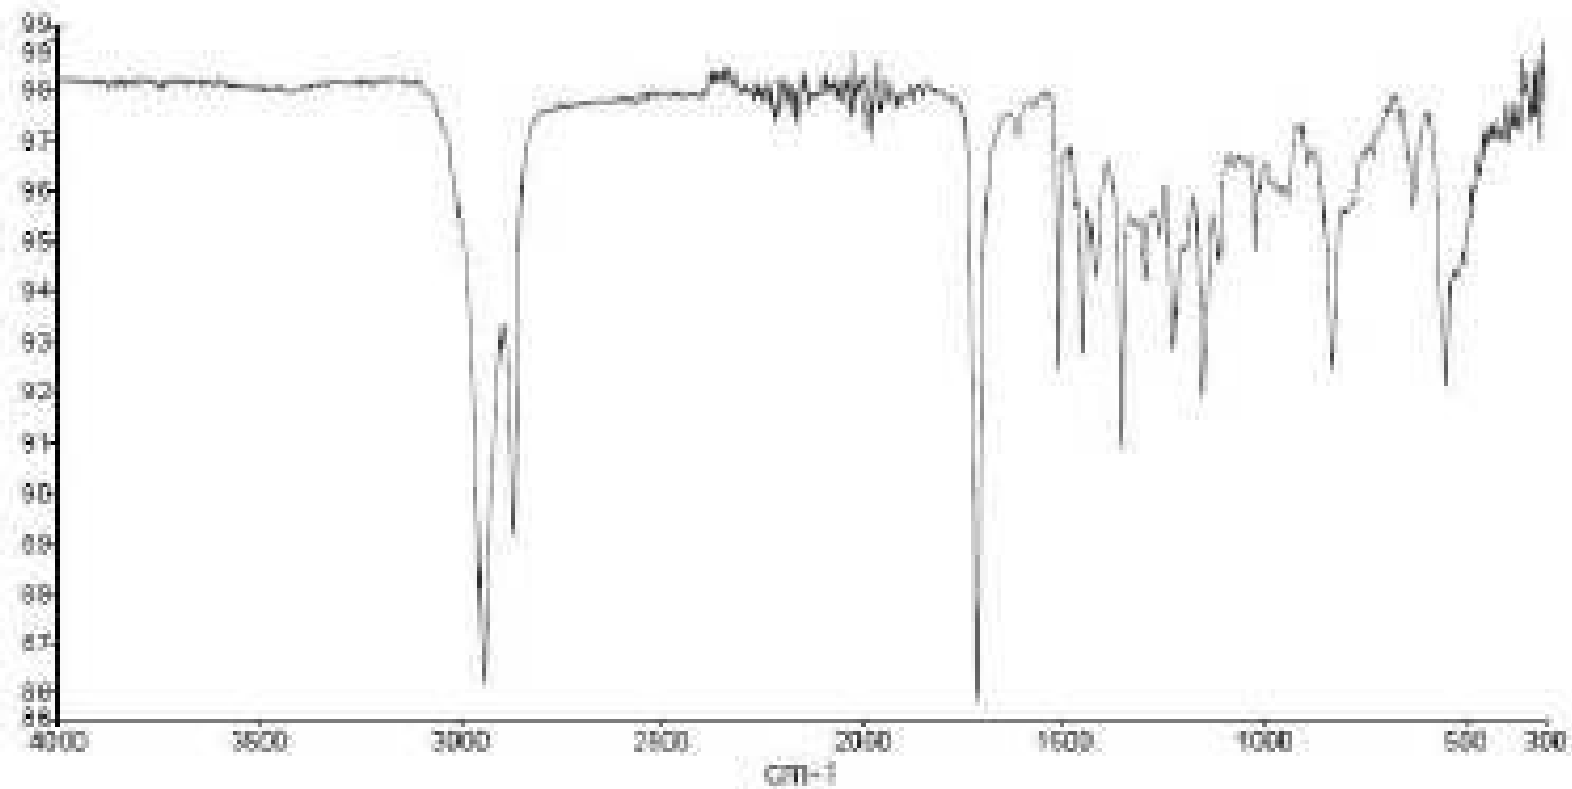

VA-PNBNBC<sub>6</sub>H<sub>4</sub>-CH=CH<sub>2</sub> (**10**) <sup>13</sup>C CP-MAS NMR

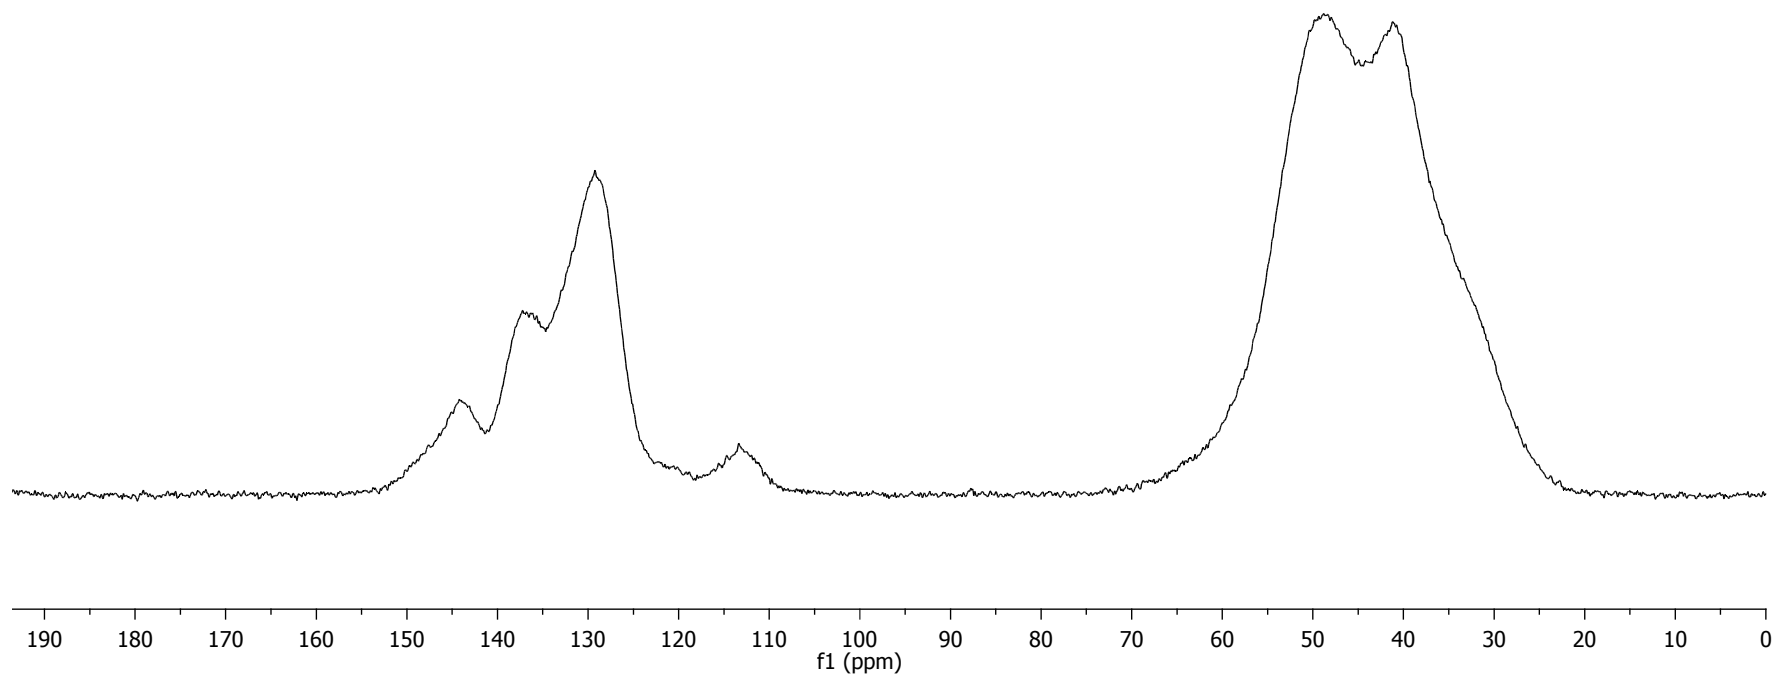



VA-PNBNBC<sub>6</sub>H<sub>4</sub>-CH=CH<sub>2</sub> (10) IR

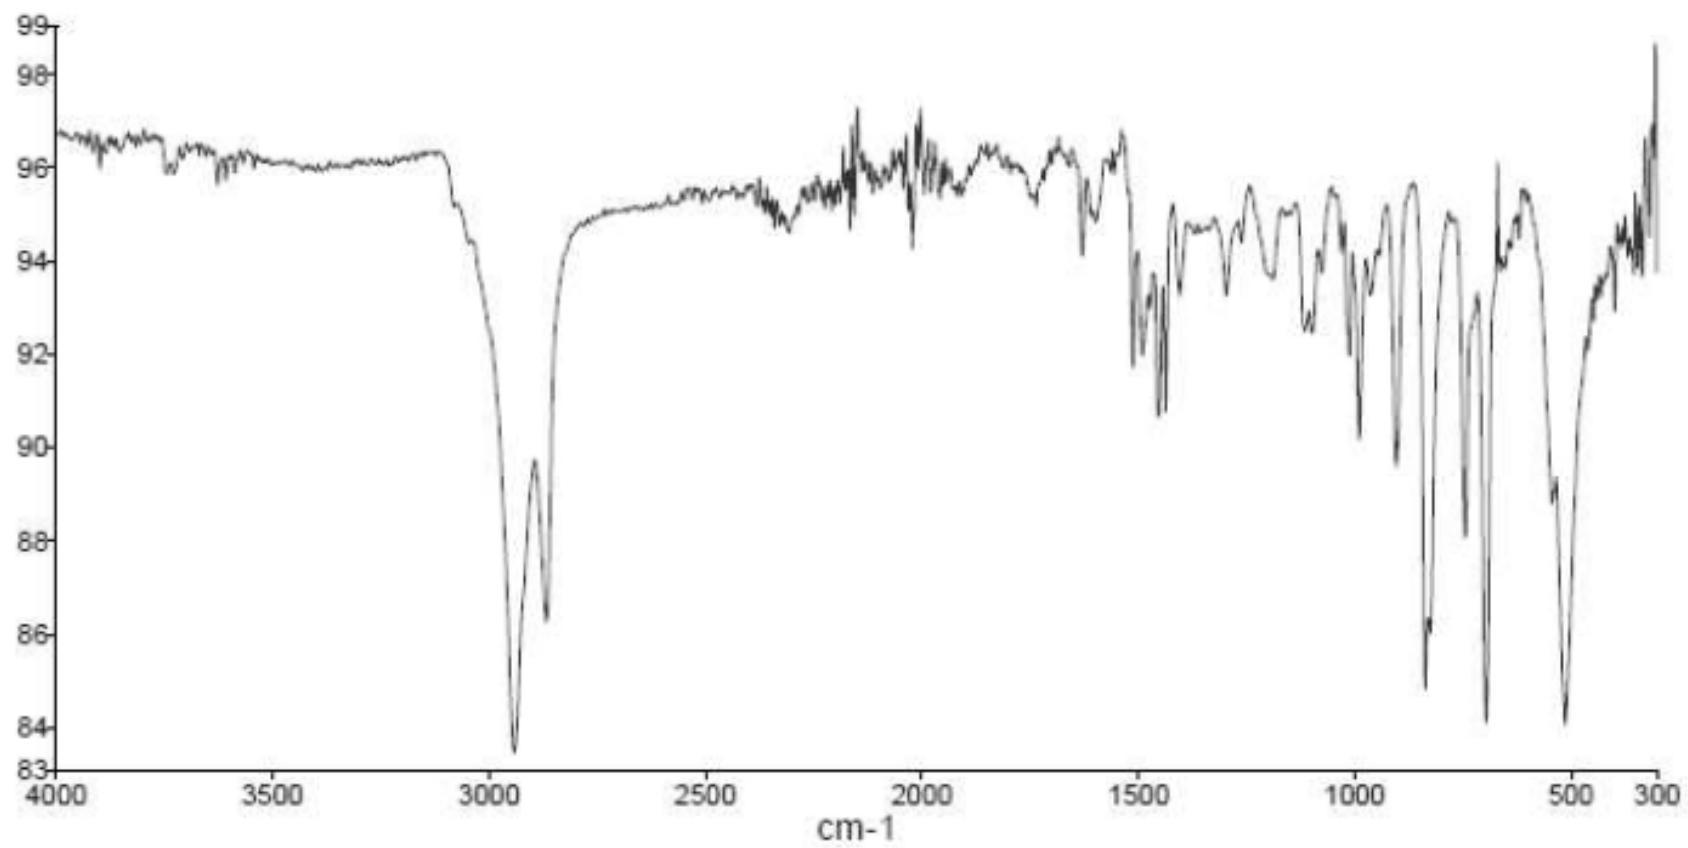

VA-PNBNBC<sub>6</sub>H<sub>4</sub>-NHPh (**11**) <sup>13</sup>C CP-MAS NMR

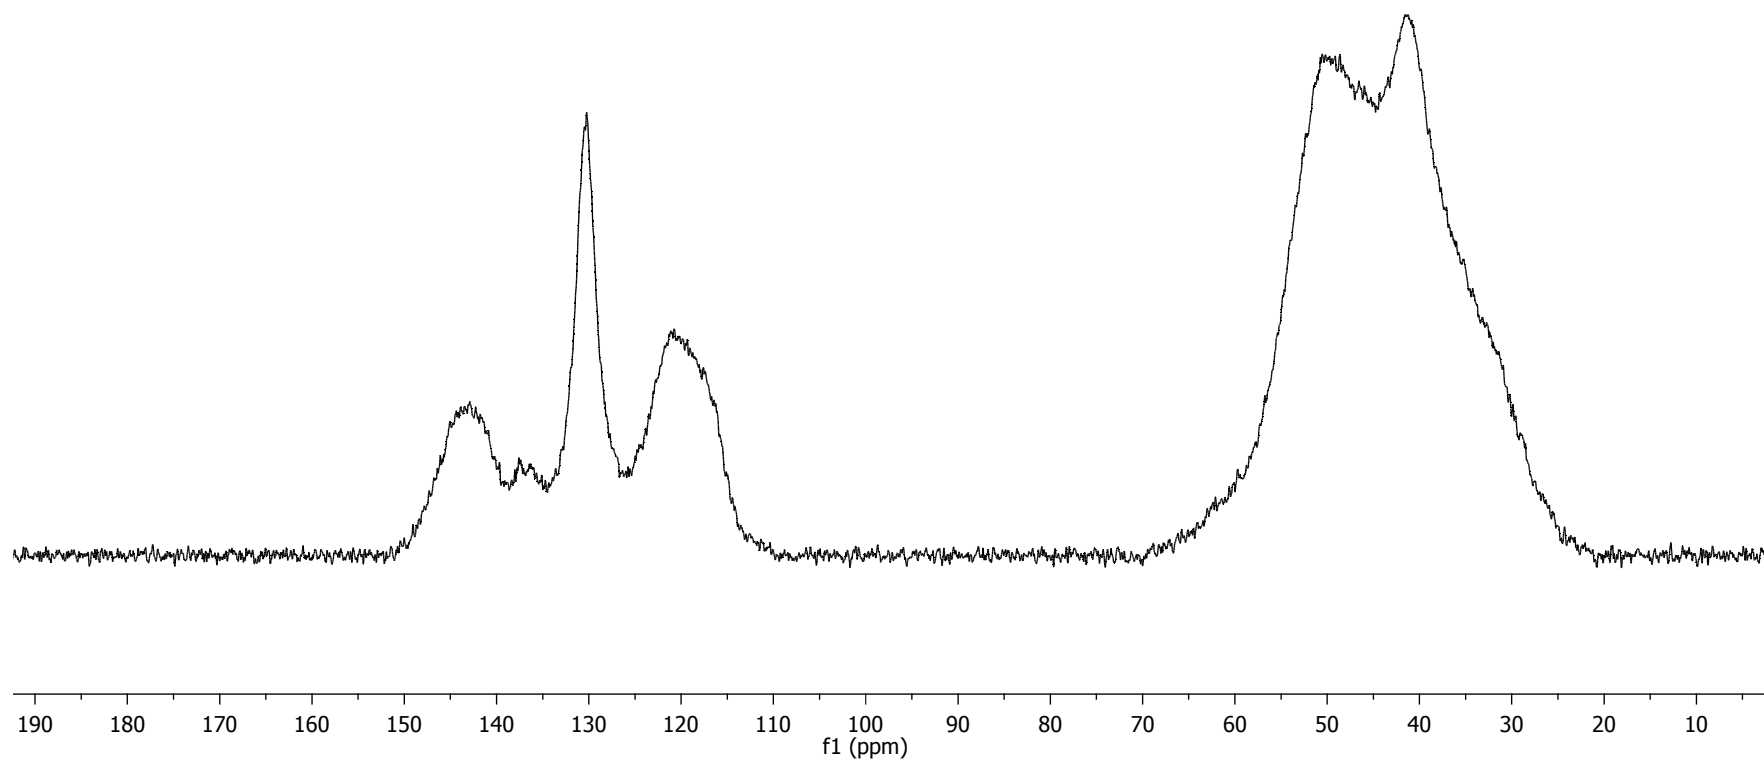

VA-PNBNBC<sub>6</sub>H<sub>4</sub>-NHPH (11) IR

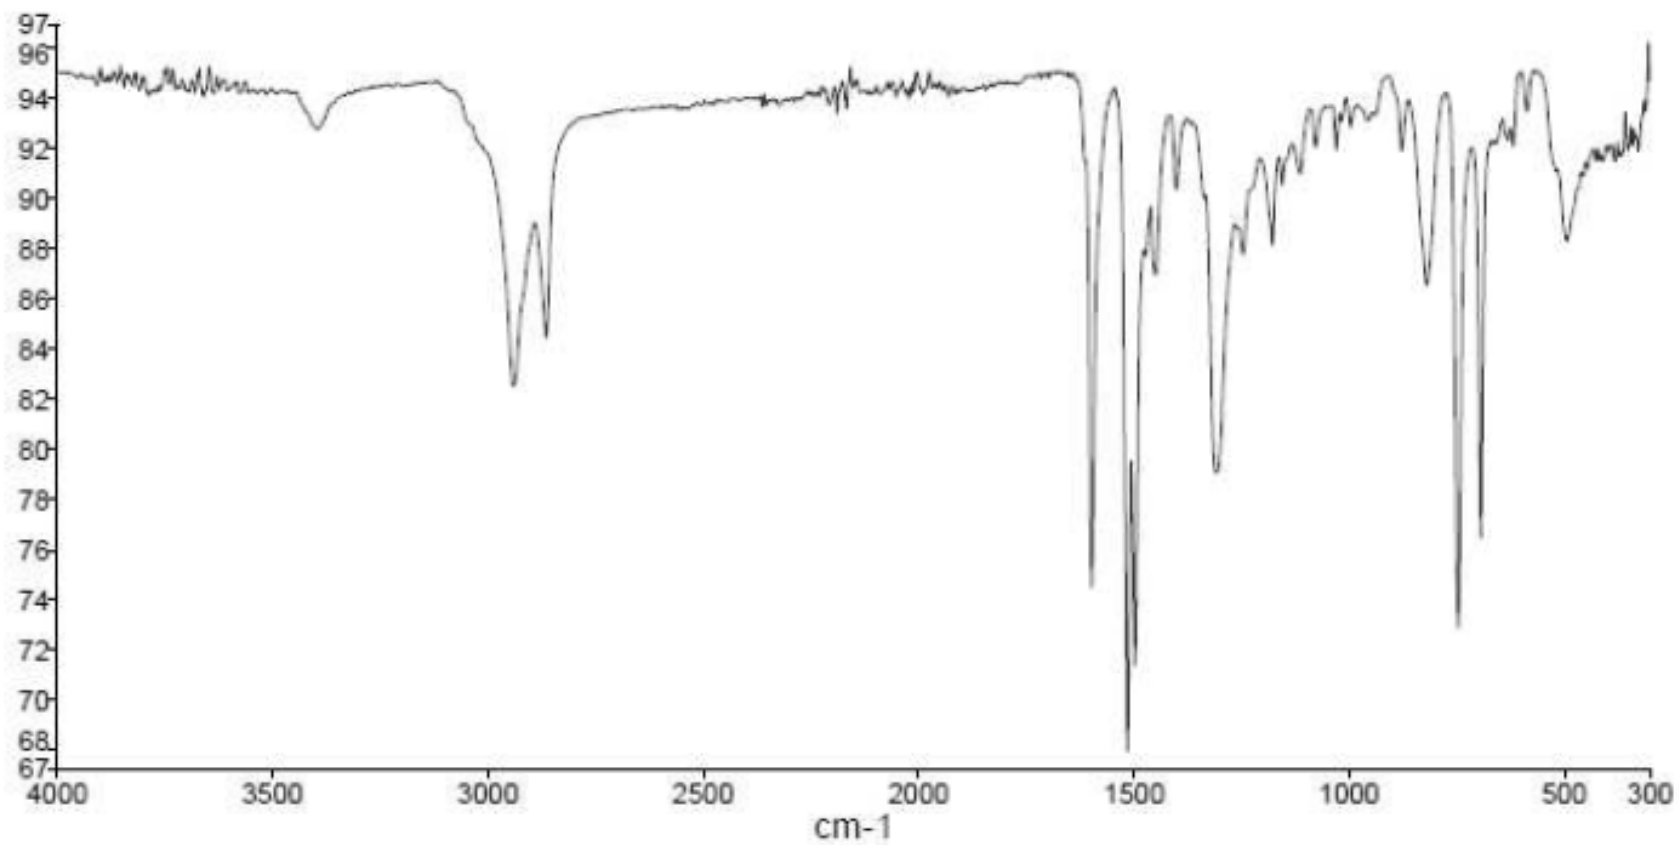

VA-PNBNBC<sub>6</sub>H<sub>4</sub>-NH(C<sub>6</sub>H<sub>4</sub>-4-OMe) (**12**) <sup>13</sup>C CP-MAS NMR

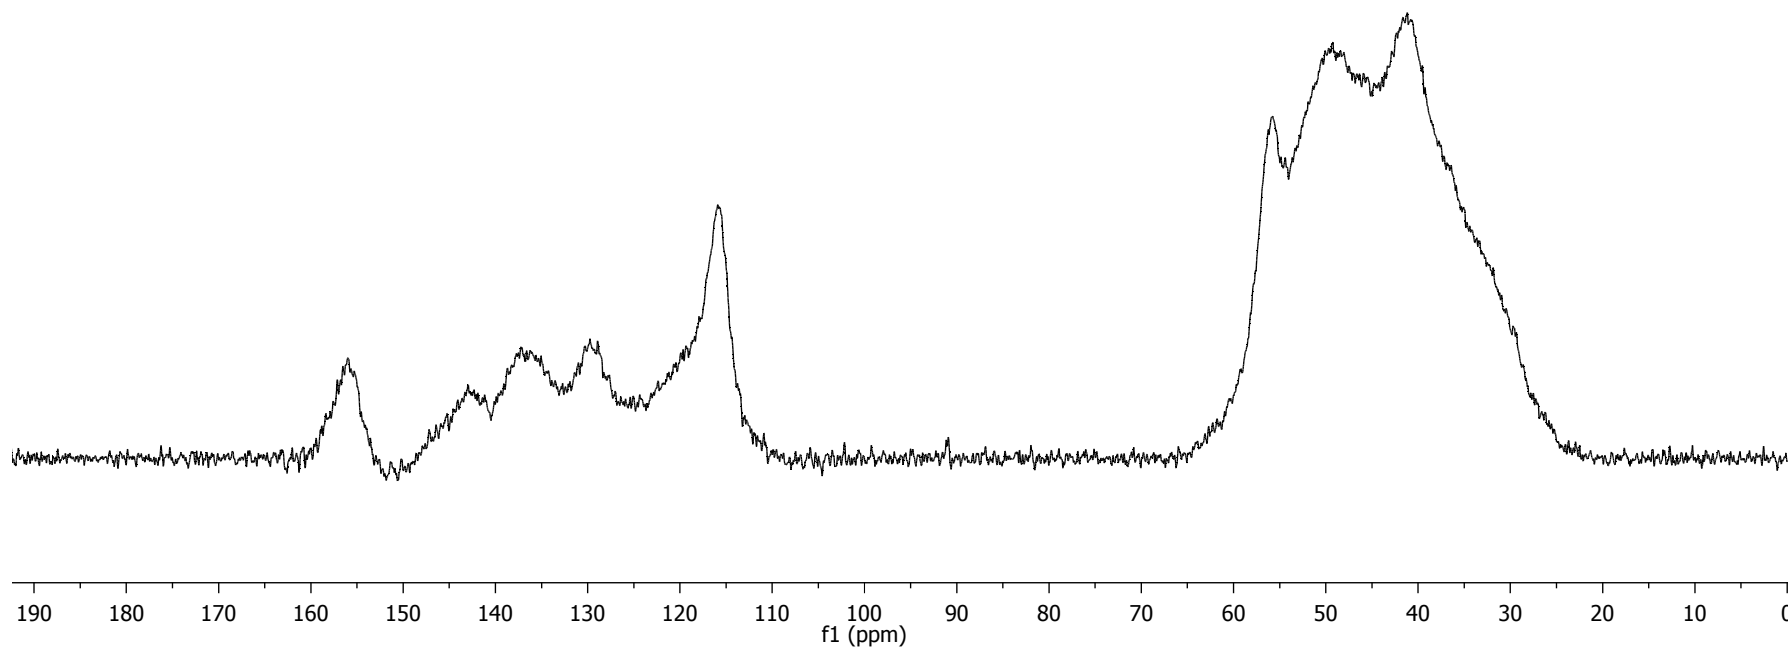

VA-PNBNBC<sub>6</sub>H<sub>4</sub>-NH(C<sub>6</sub>H<sub>4</sub>-4-OMe) (12) IR

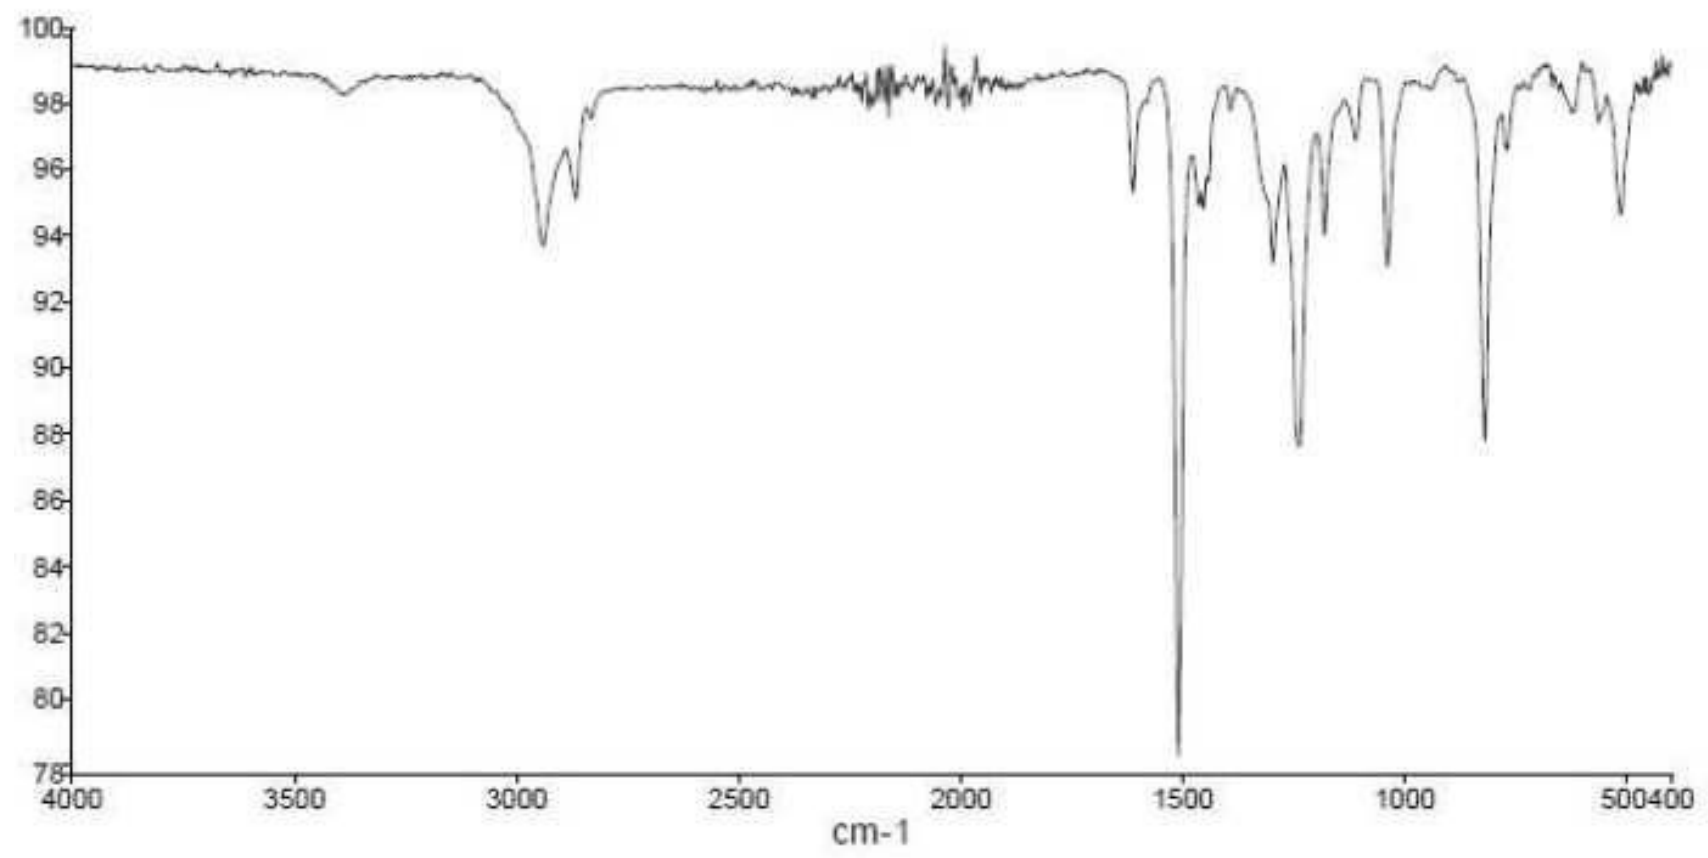

VA-PNBNBC<sub>6</sub>H<sub>4</sub>-NH(C<sub>6</sub>H<sub>4</sub>-3-CF<sub>3</sub>) (**13**) <sup>13</sup>C CP-MAS NMR

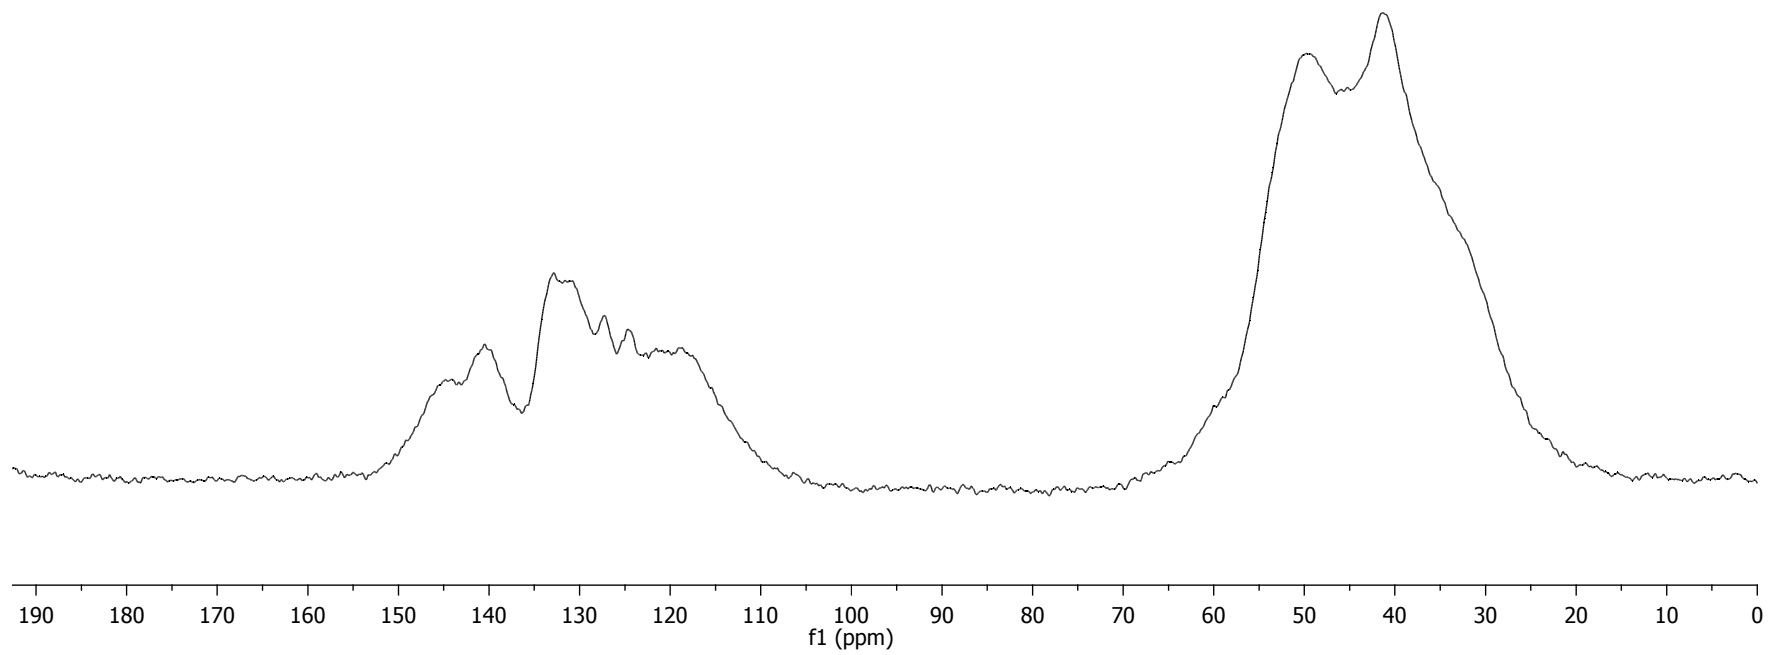

VA-PNBNBC<sub>6</sub>H<sub>4</sub>-NH(C<sub>6</sub>H<sub>4</sub>-3-CF<sub>3</sub>) (**13**) <sup>19</sup>F MAS NMR

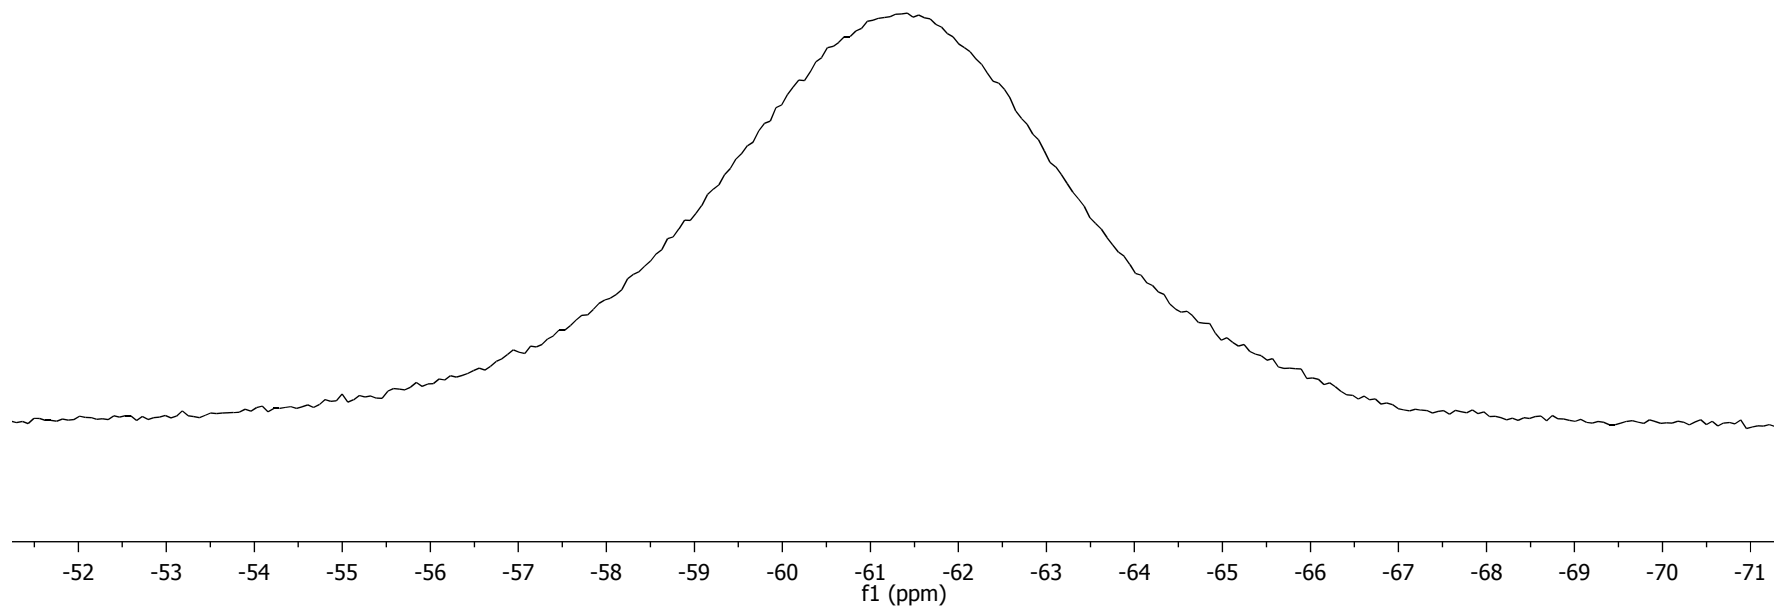

VA-PNBNBC<sub>6</sub>H<sub>4</sub>-NH(C<sub>6</sub>H<sub>4</sub>-3-CF<sub>3</sub>) (13) IR

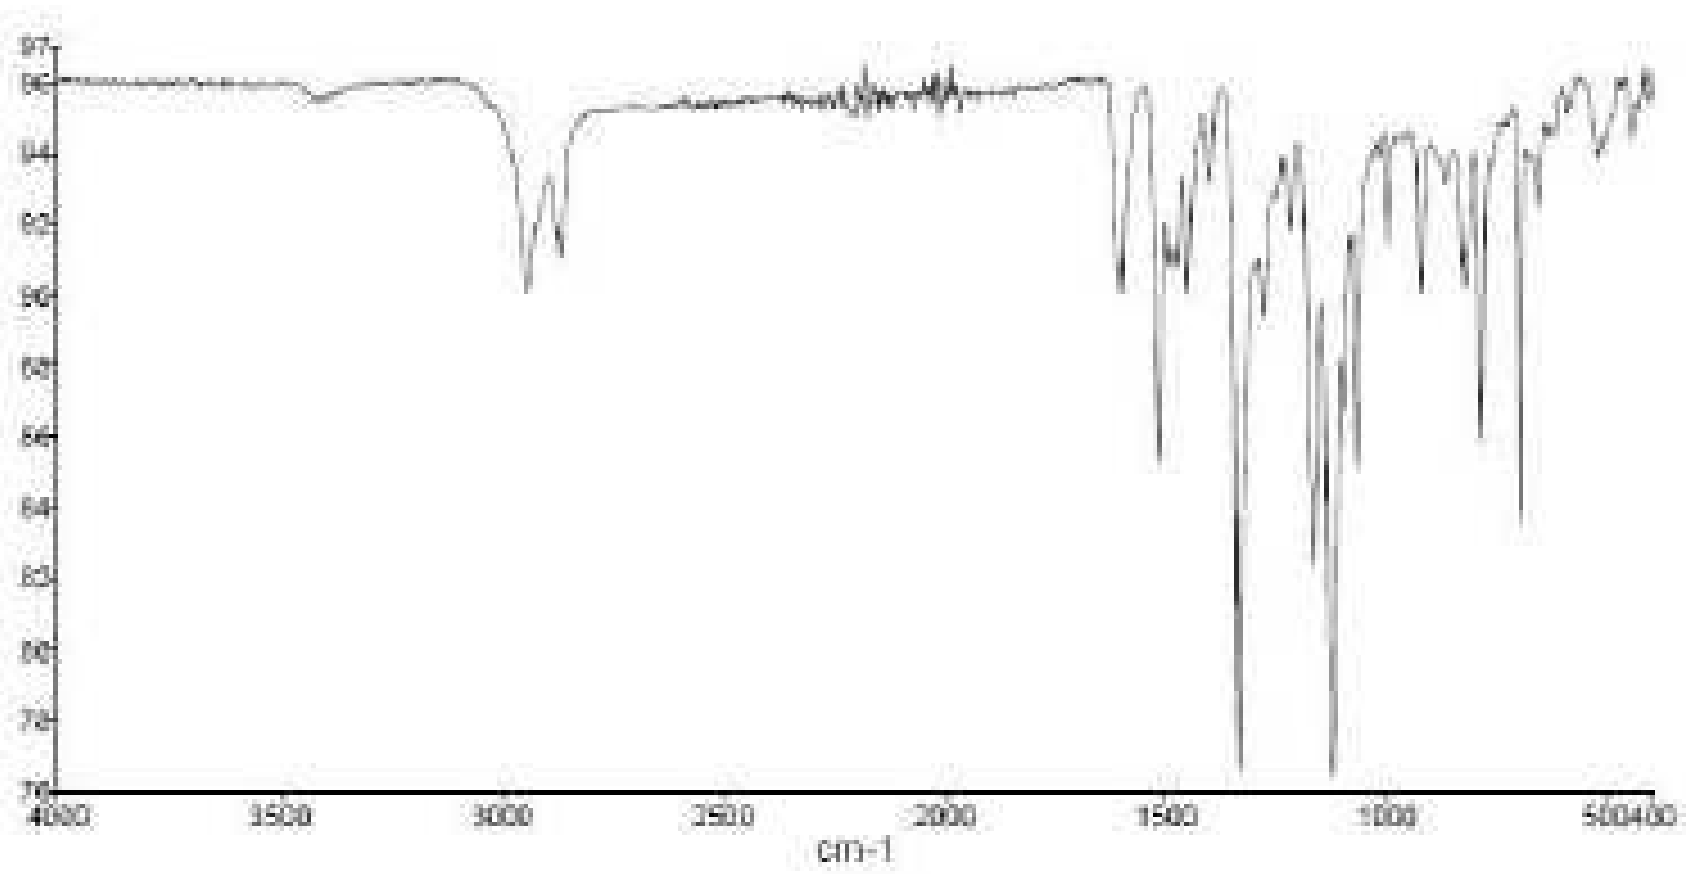



VA-PNBNBC<sub>6</sub>H<sub>4</sub>-NH(C<sub>6</sub>H<sub>4</sub>-4-NO<sub>2</sub>) (**14**) <sup>13</sup>C CP-MAS NMR

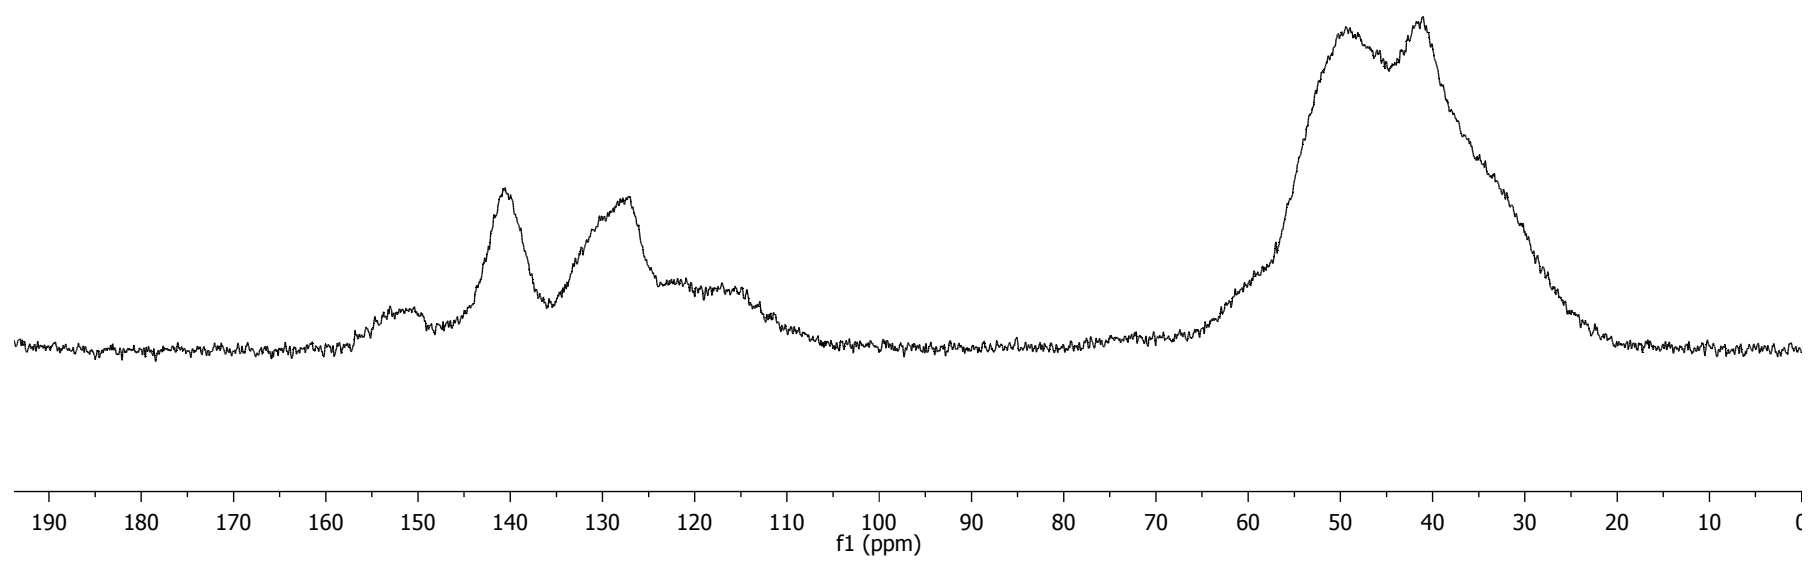

VA-PNBNBC<sub>6</sub>H<sub>4</sub>-NH(C<sub>6</sub>H<sub>4</sub>-4-NO<sub>2</sub>) (**14**) IR

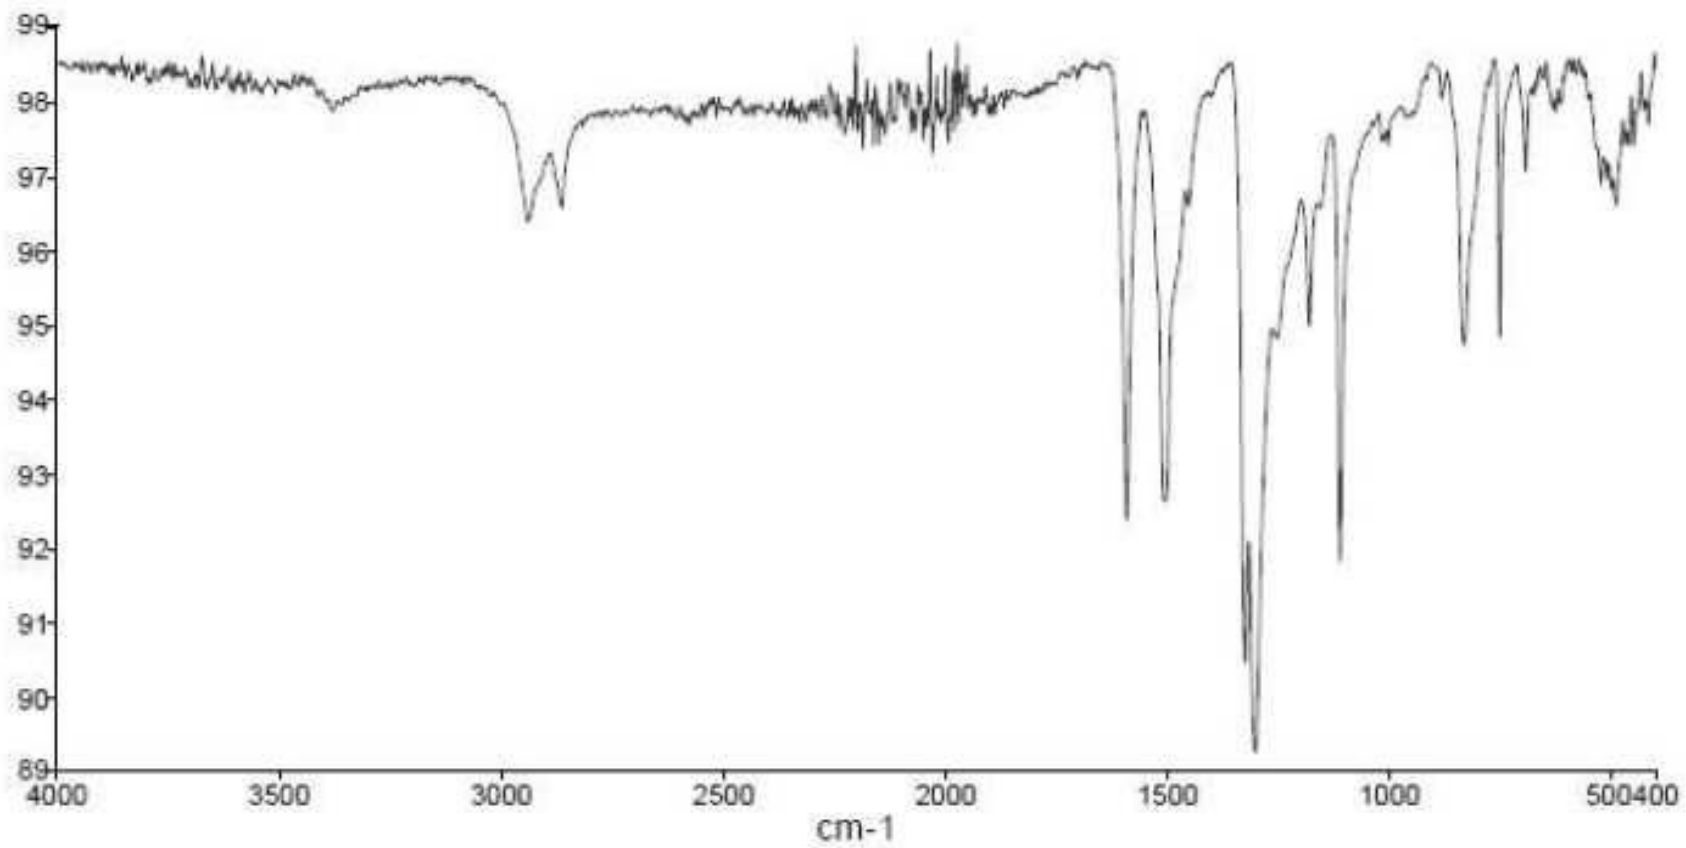

VA-PNBNBC<sub>6</sub>H<sub>4</sub>-NH(C<sub>6</sub>H<sub>3</sub>-2,6-diMe) (**15**) <sup>13</sup>C CP-MAS NMR

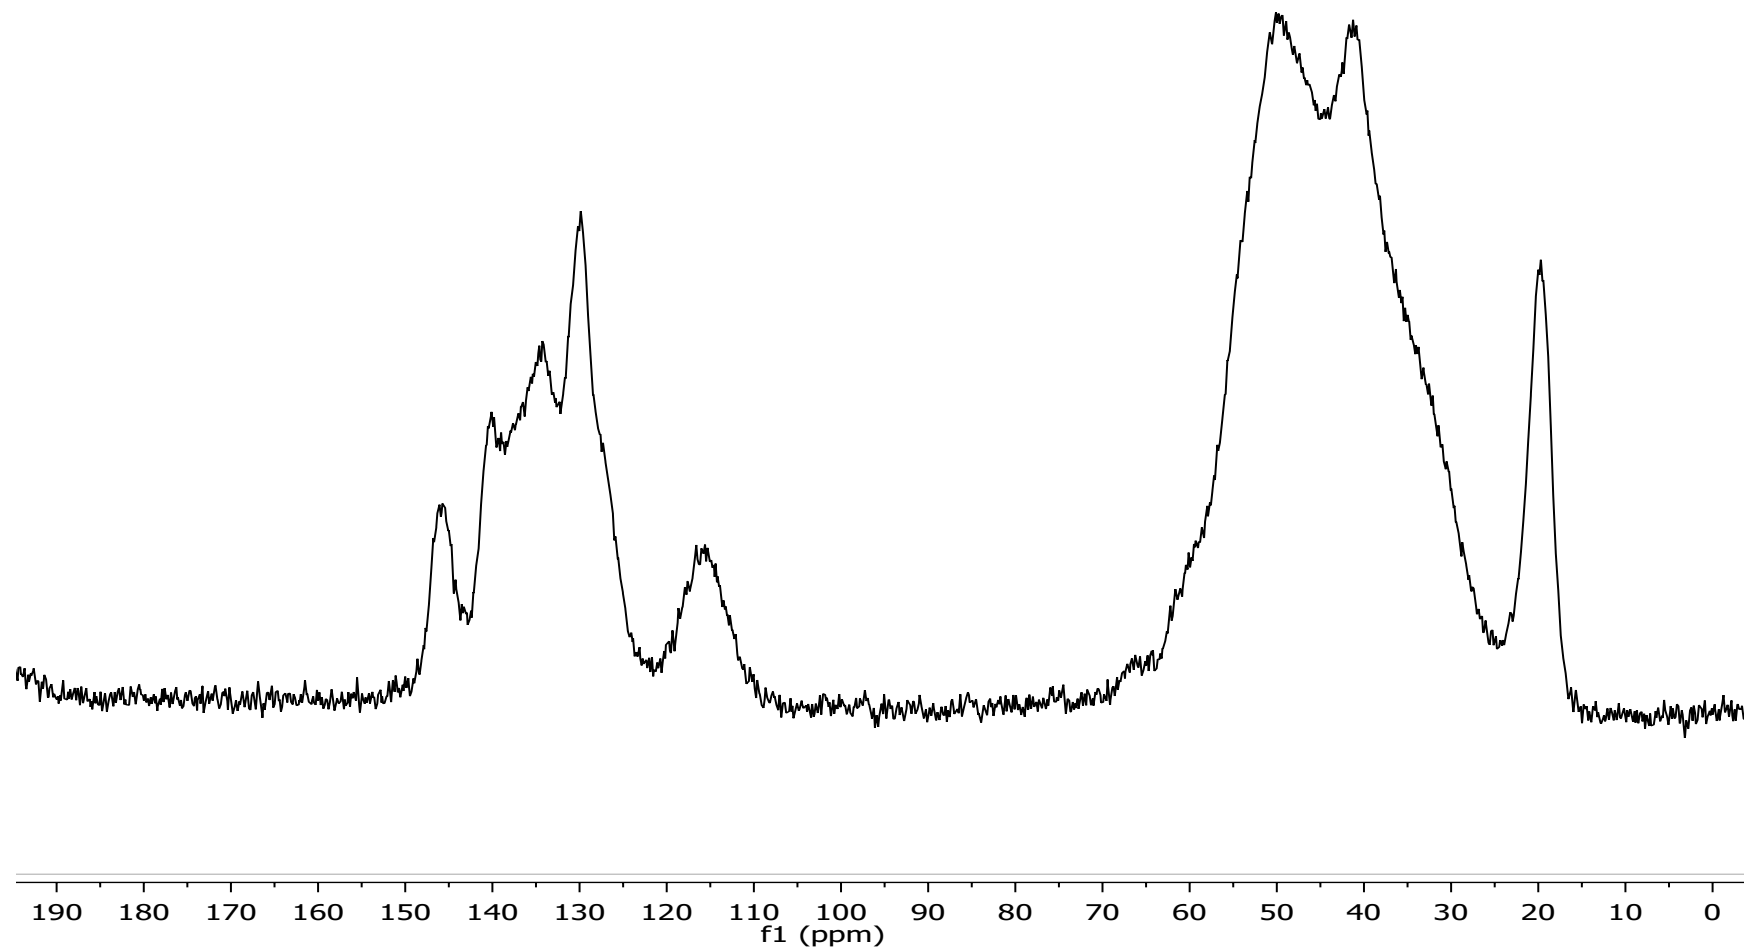

VA-PNBNBC<sub>6</sub>H<sub>4</sub>-NH(C<sub>6</sub>H<sub>3</sub>-2,6-diMe) (**15**) IR

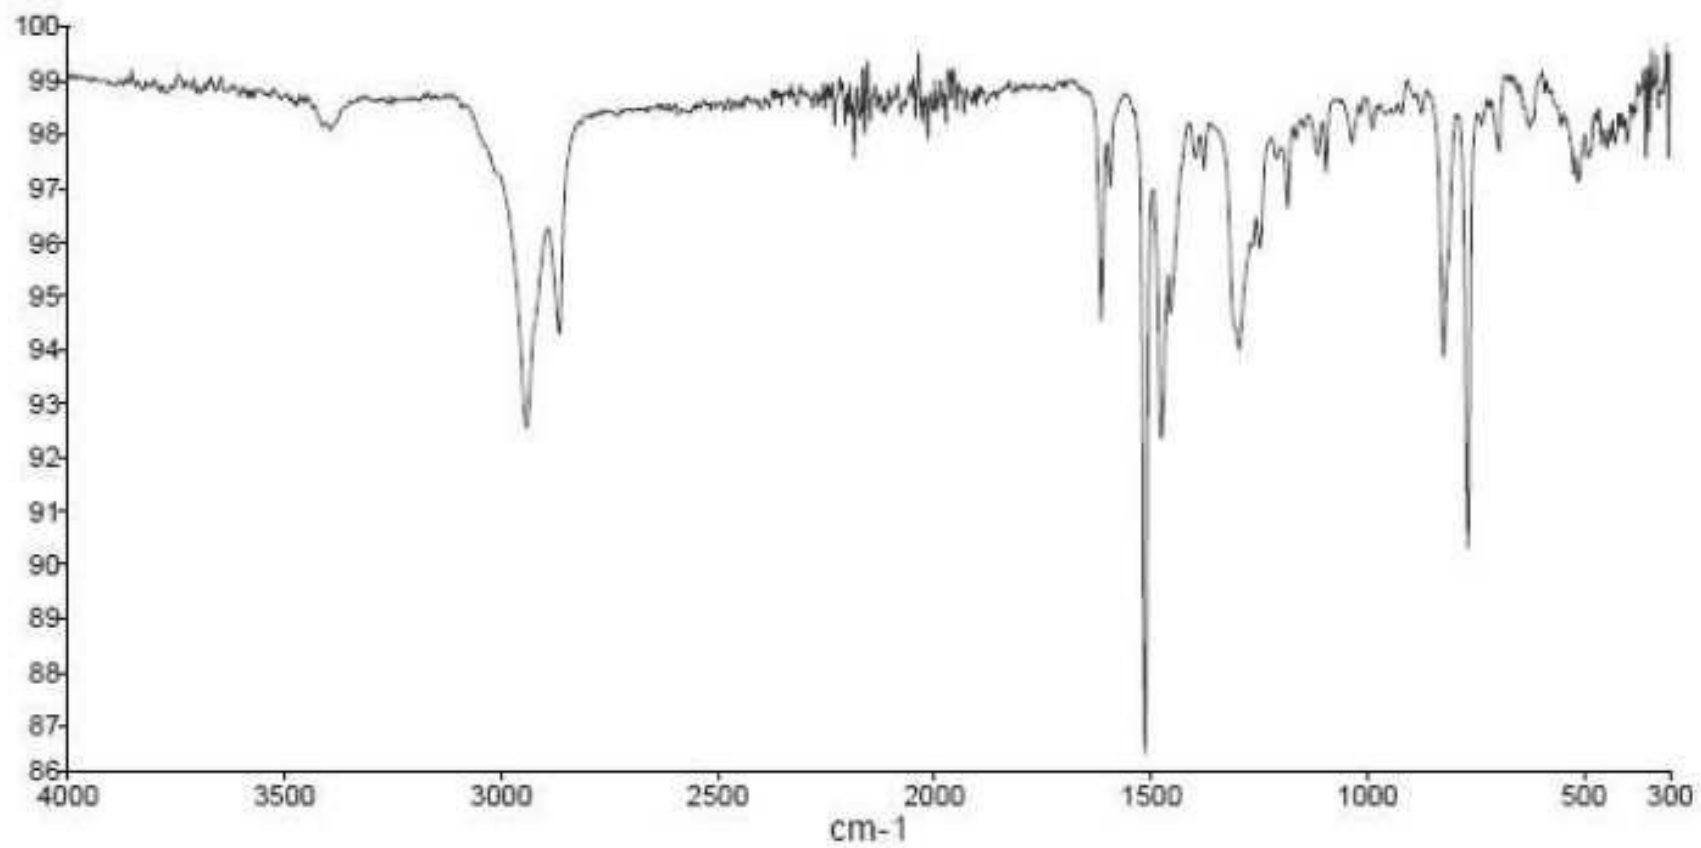

VA-PNBNB(CH<sub>2</sub>)<sub>4</sub>Ph (**17**) <sup>13</sup>C CP-MAS NMR

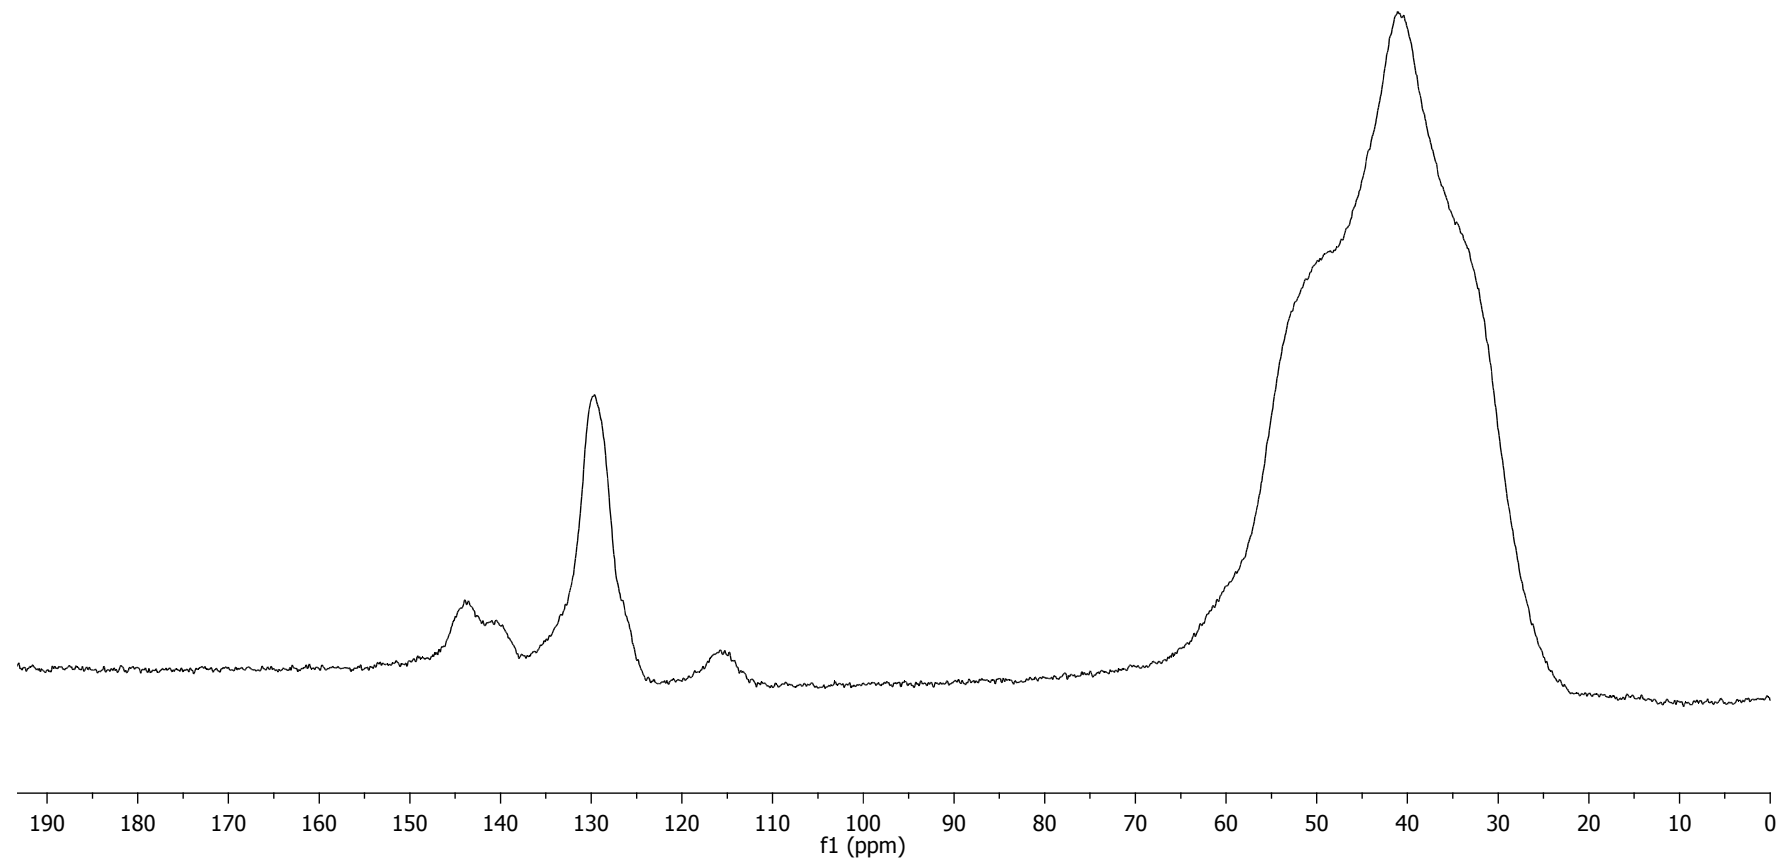

VA-PNBNB(CH<sub>2</sub>)<sub>4</sub>Ph (17) IR

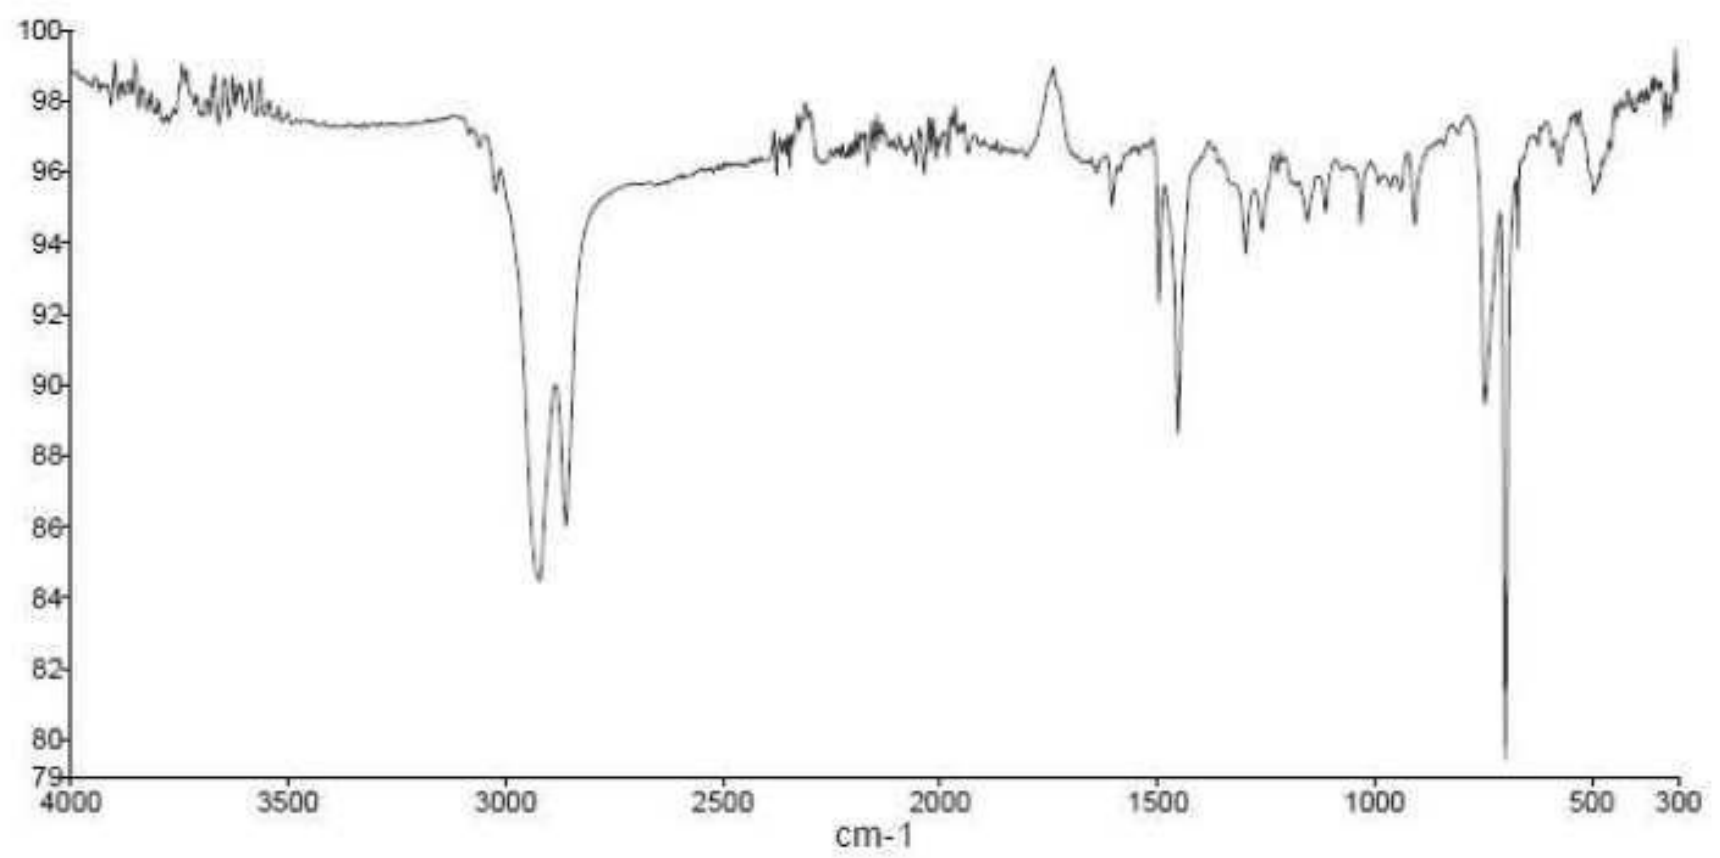

VA-PNBNB(CH<sub>2</sub>)<sub>4</sub>-C<sub>6</sub>H<sub>4</sub>-4-OMe (**18**) <sup>13</sup>C CP-MAS NMR

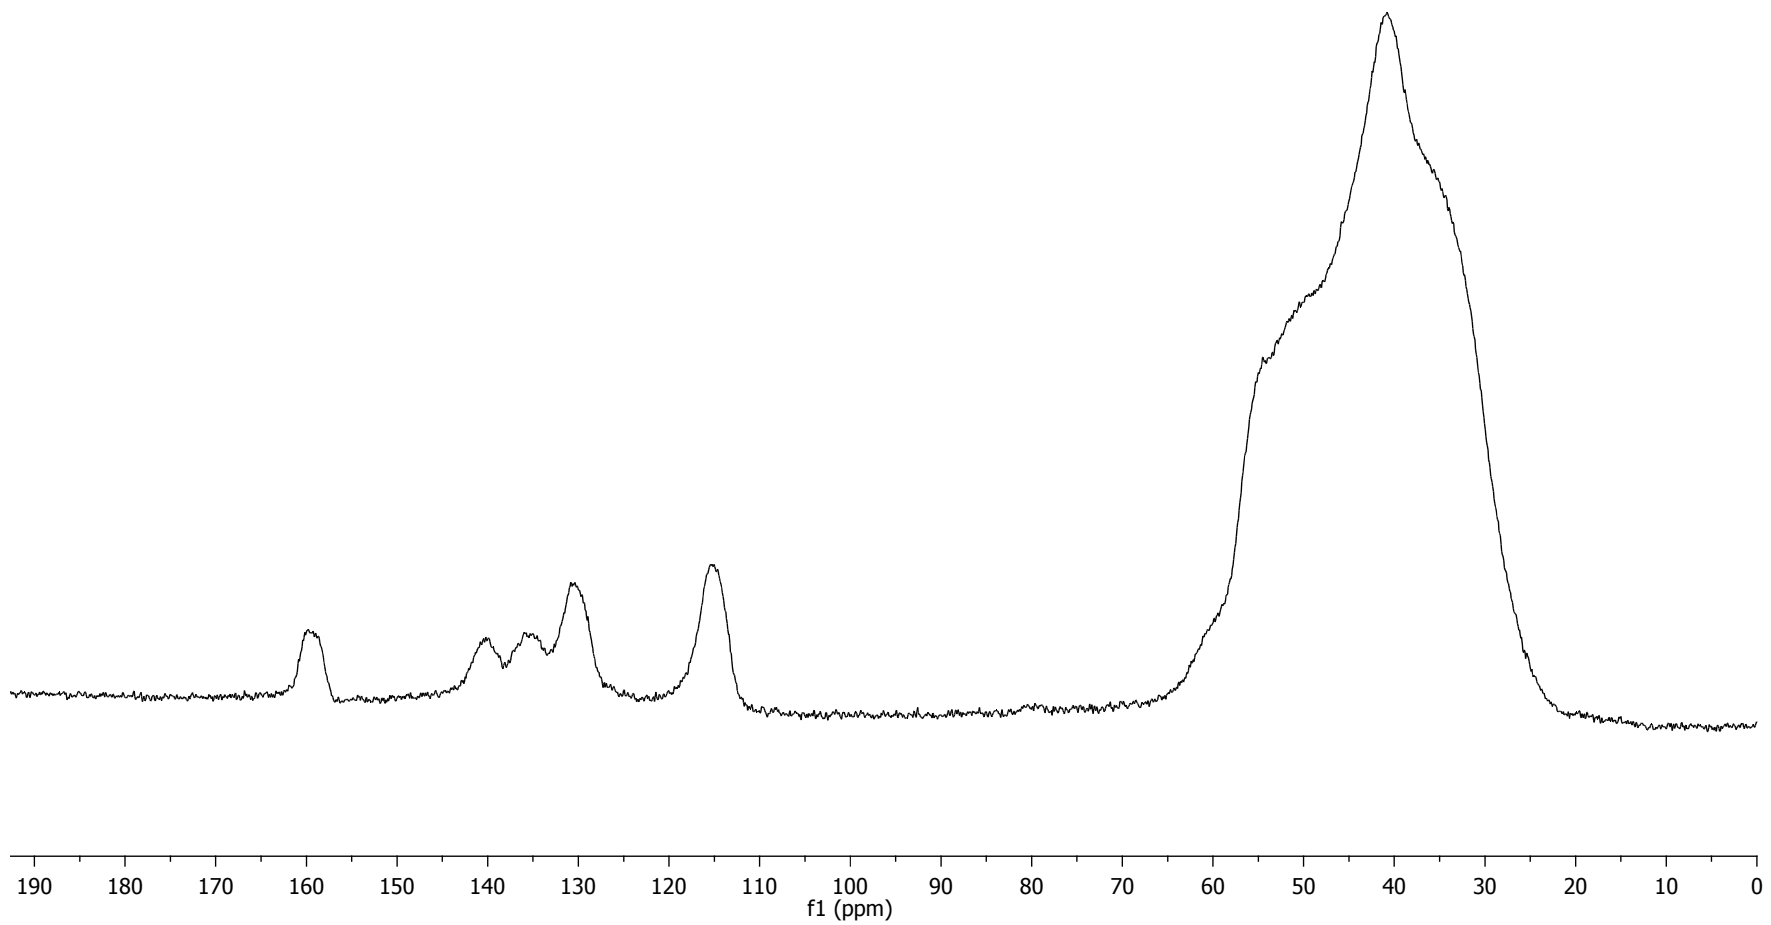

VA-PNBNB(CH<sub>2</sub>)<sub>4</sub>-C<sub>6</sub>H<sub>4</sub>-4-OMe (**18**) IR

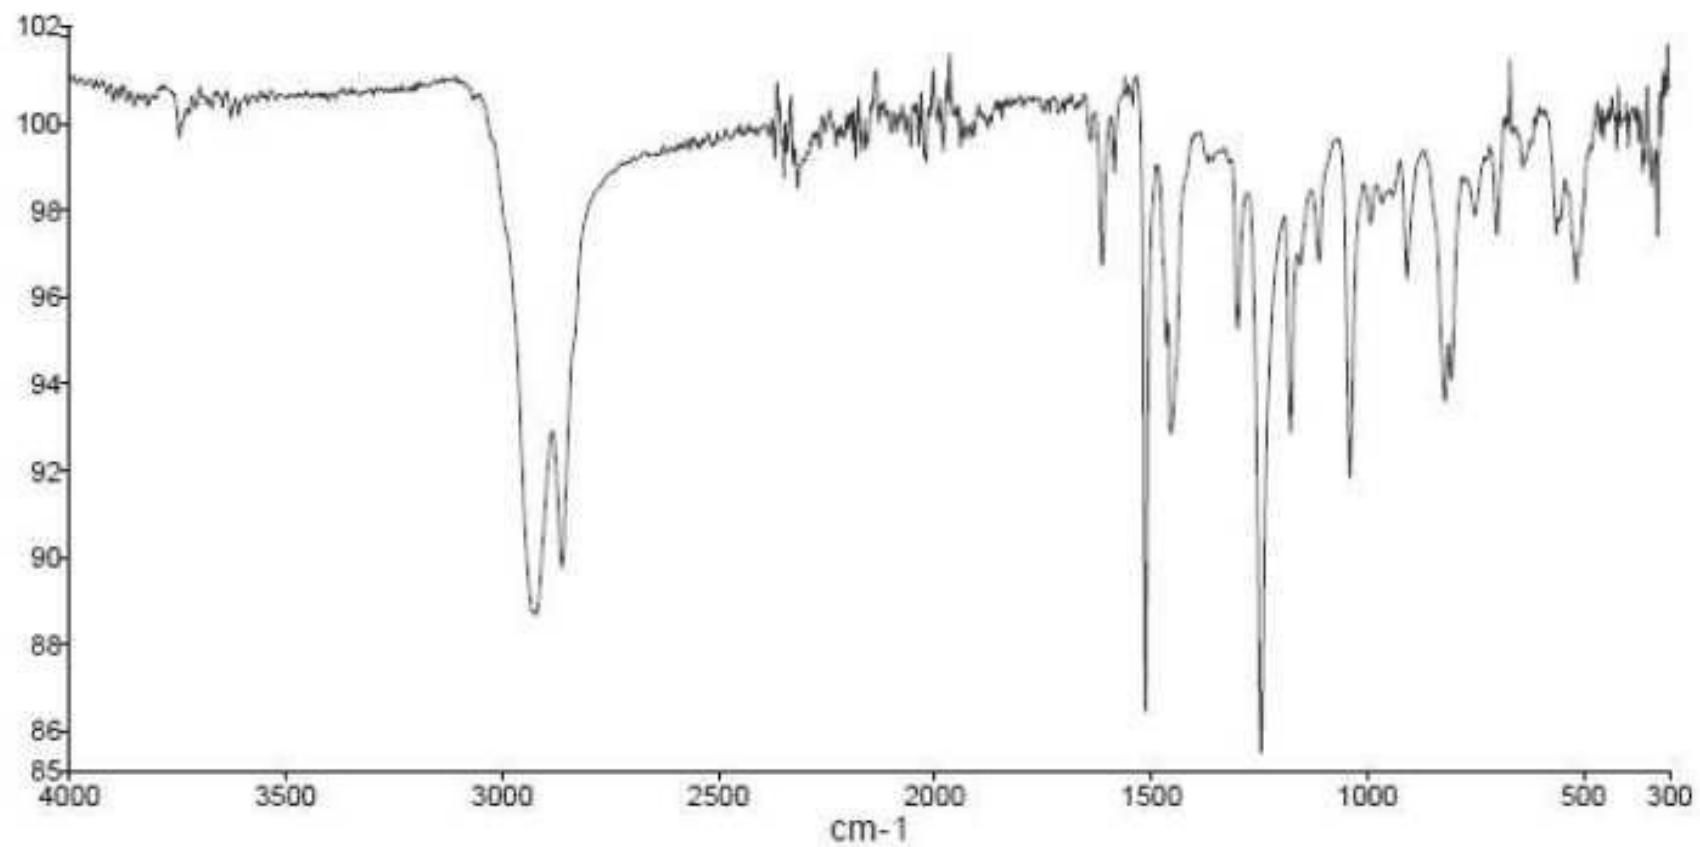



VA-PNBNB(CH<sub>2</sub>)<sub>4</sub>-C<sub>6</sub>H<sub>4</sub>-4-CF<sub>3</sub> (**19**) <sup>13</sup>C CP-MAS NMR

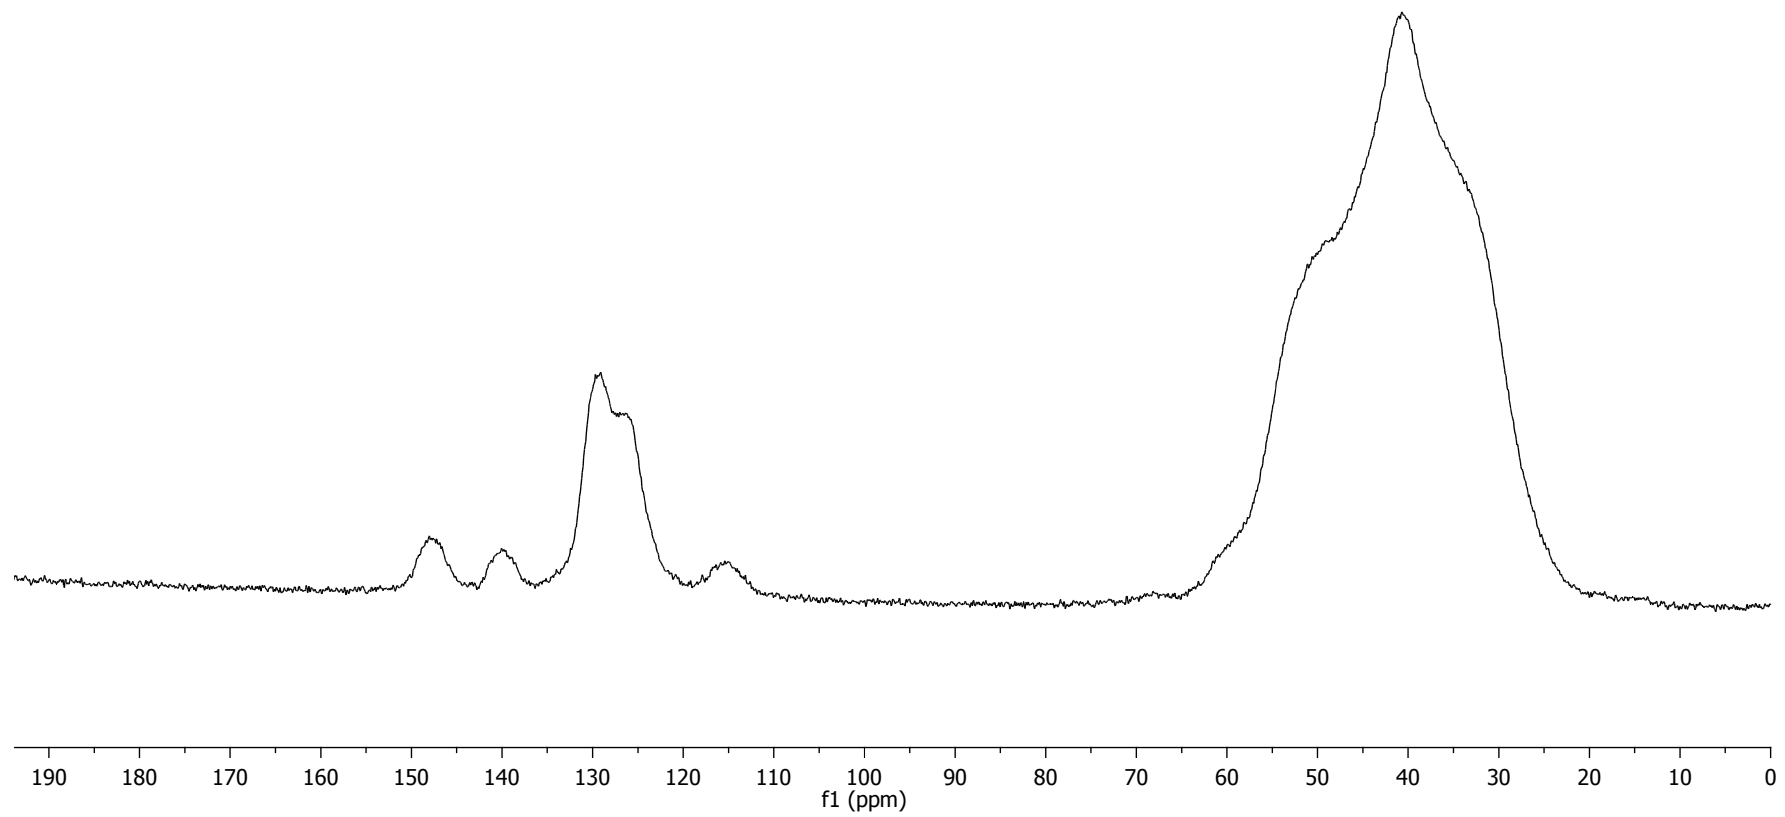

VA-PNBNB(CH<sub>2</sub>)<sub>4</sub>-C<sub>6</sub>H<sub>4</sub>-4-CF<sub>3</sub> (**19**) <sup>19</sup>F MAS NMR

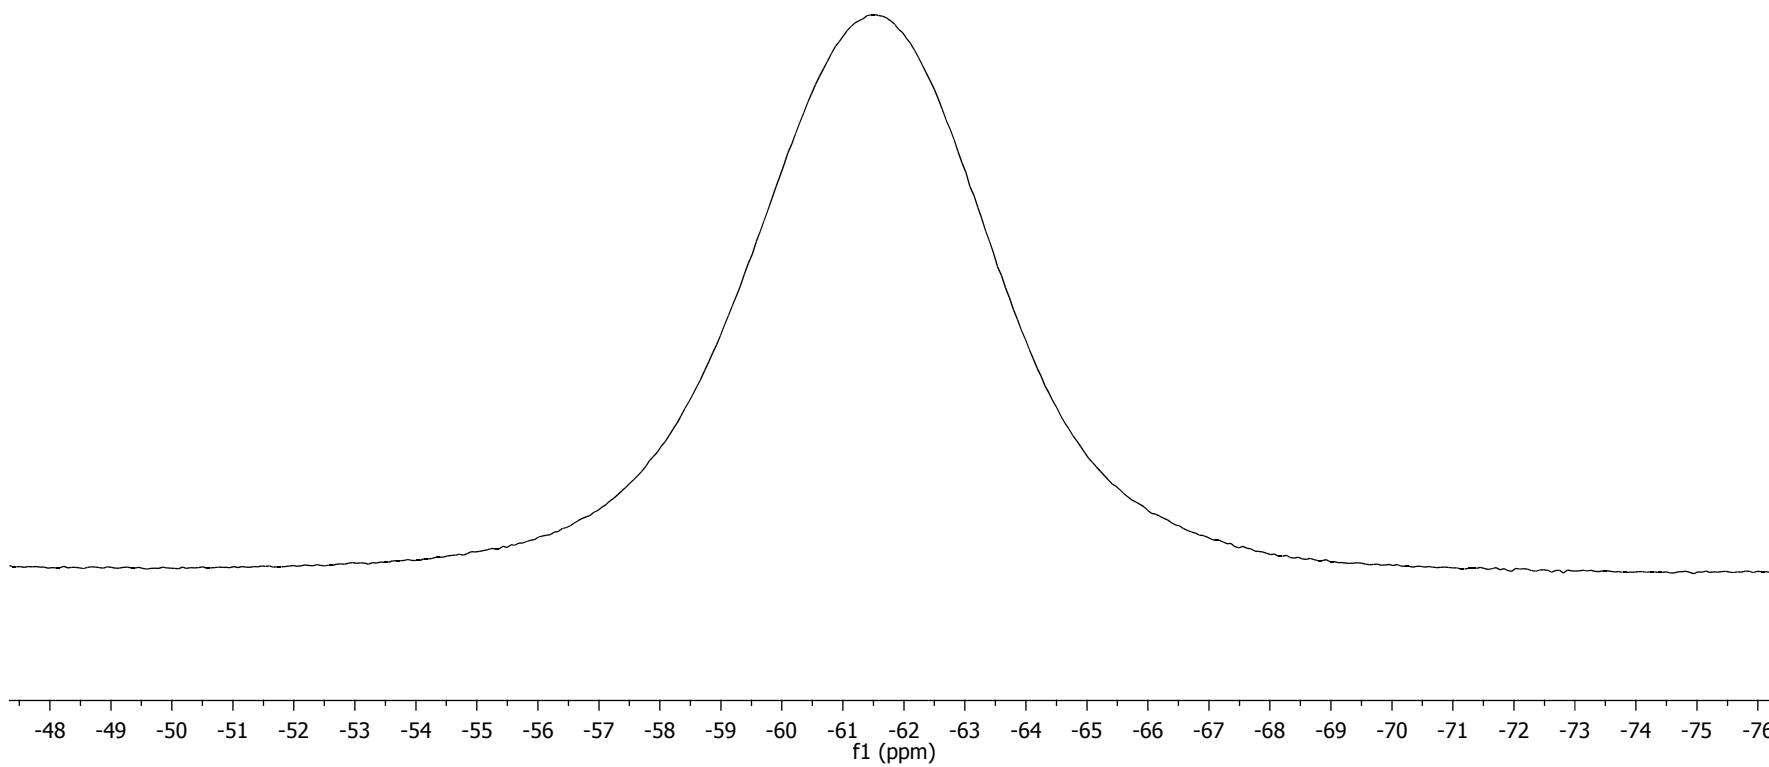

VA-PNBNB(CH<sub>2</sub>)<sub>4</sub>-C<sub>6</sub>H<sub>4</sub>-4-CF<sub>3</sub> (**19**) IR

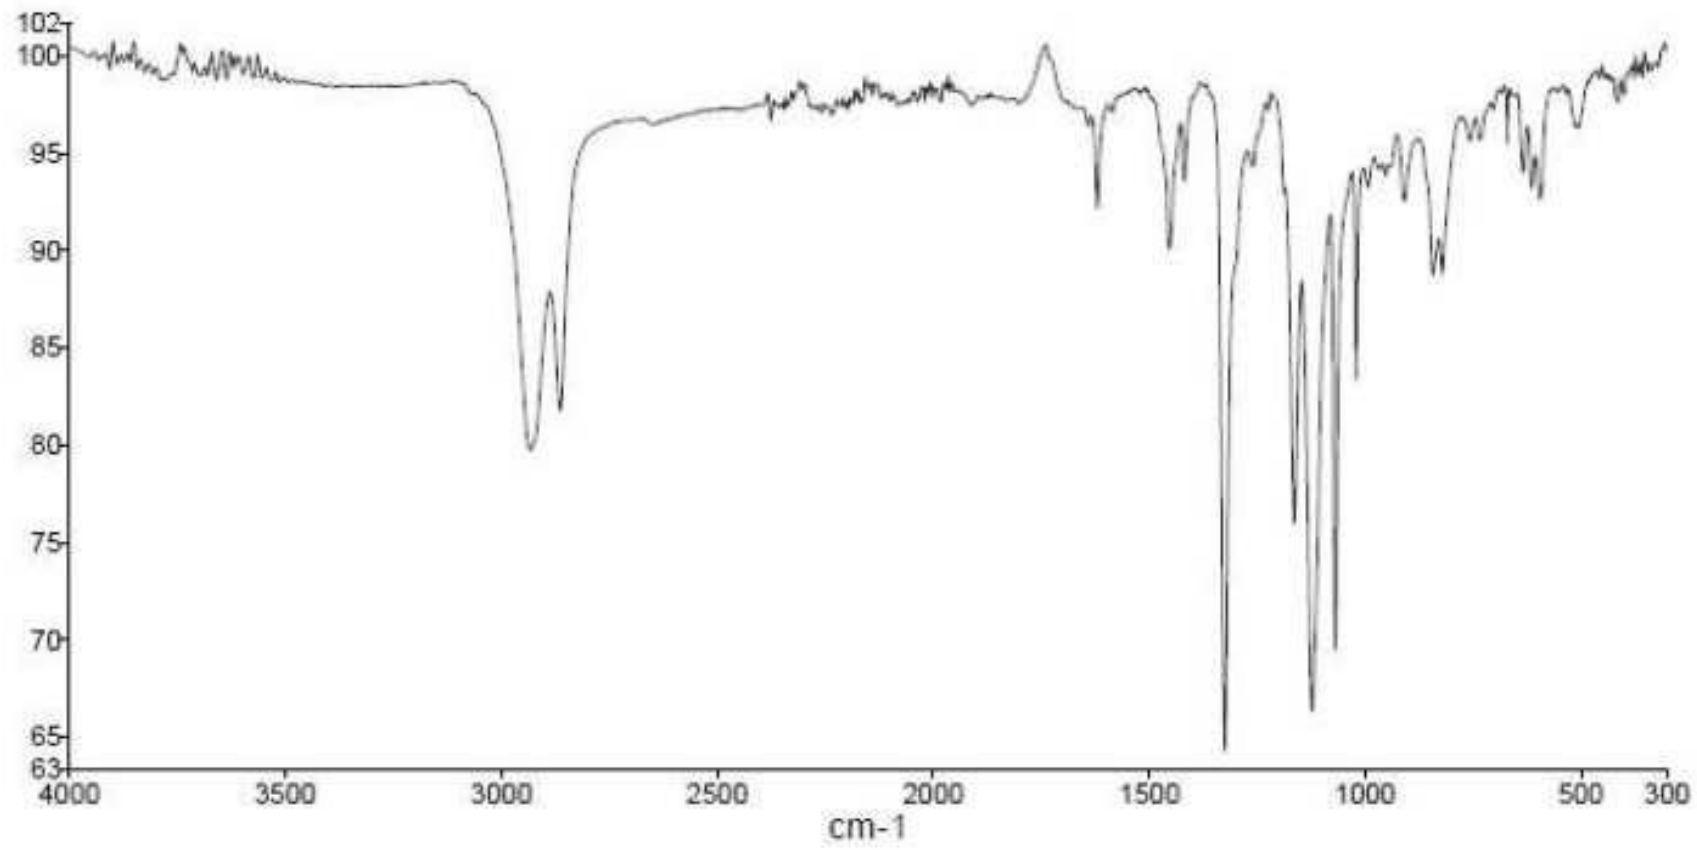

VA-PNBNB(CH<sub>2</sub>)<sub>2</sub>-CH=CH<sub>2</sub> (**20**) <sup>13</sup>C CP-MAS NMR

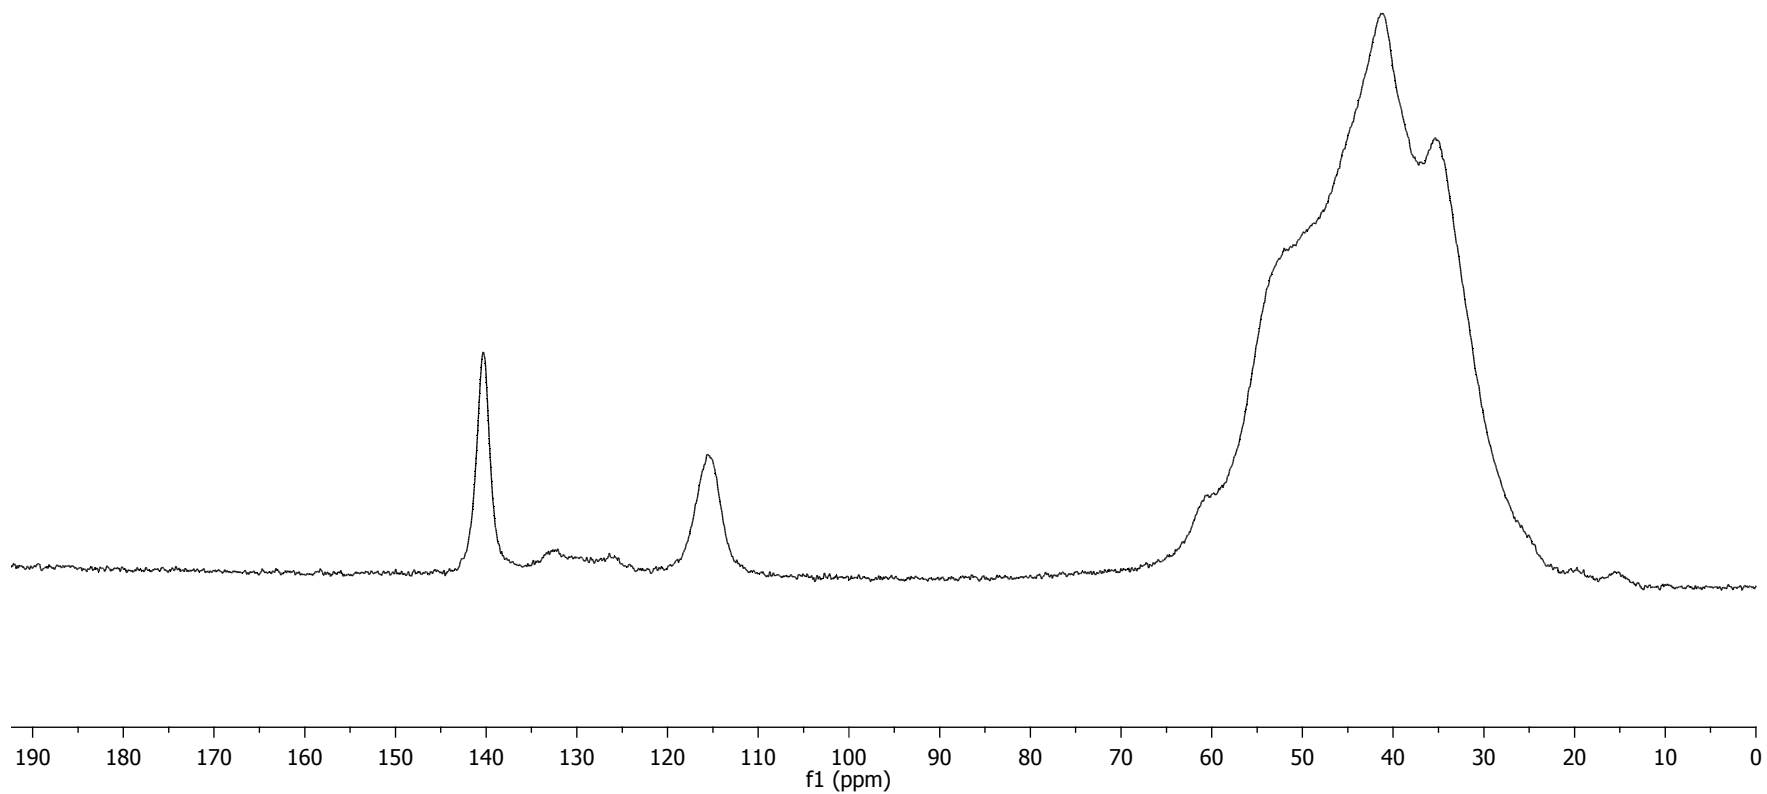

VA-PNBNB(CH<sub>2</sub>)<sub>2</sub>-CH=CH<sub>2</sub> (**20**) IR

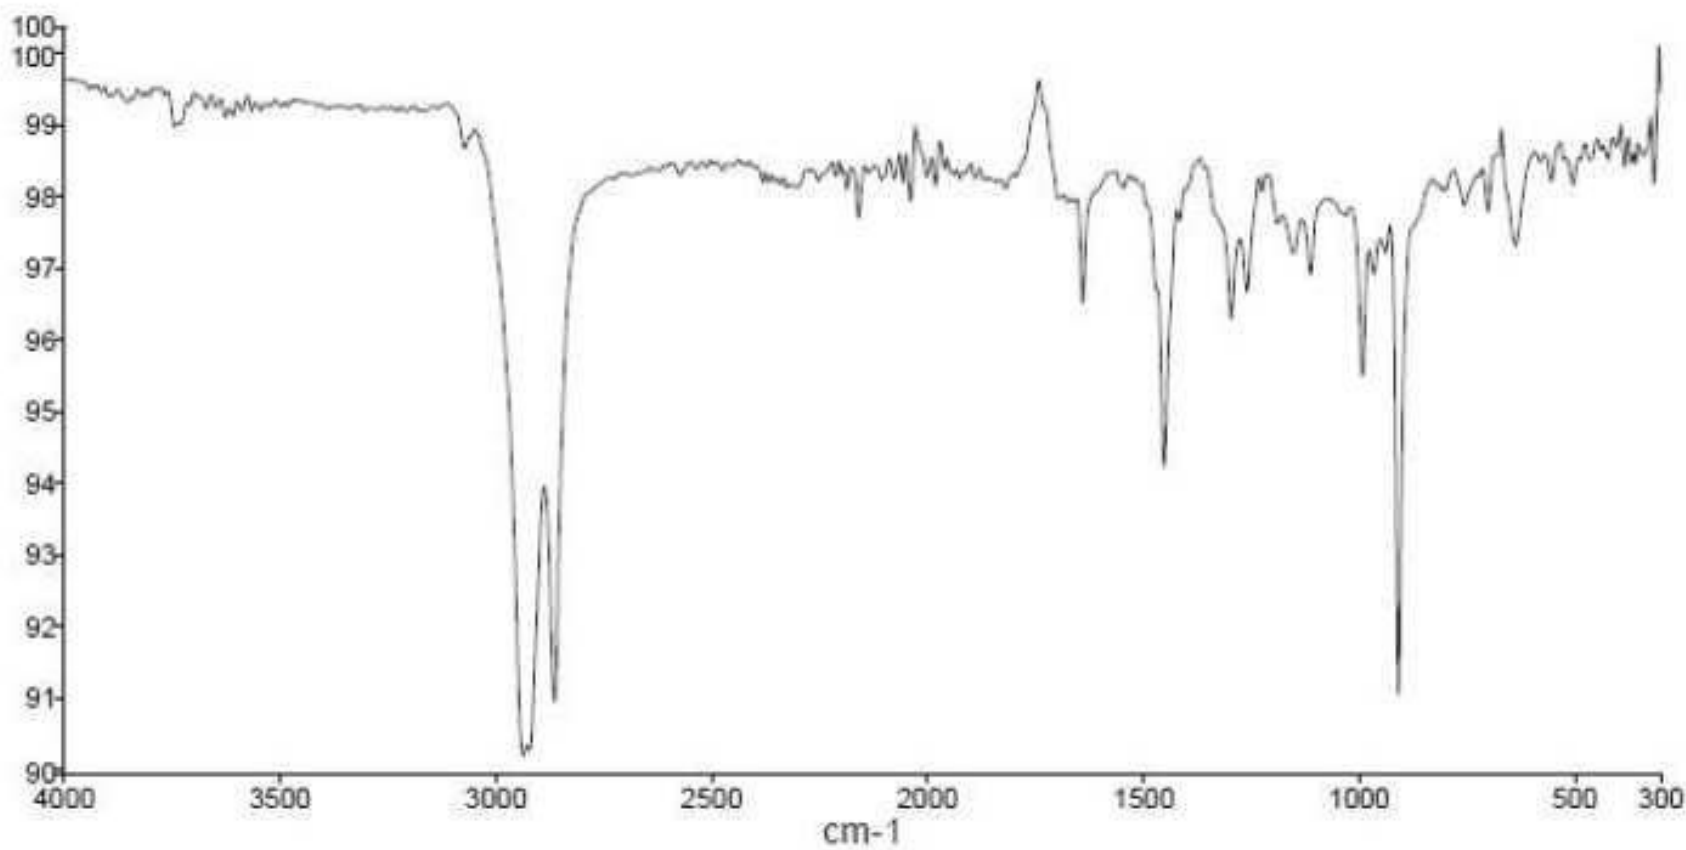

Supplement: c6ra23123c1.pdf [file c6ra23123c1.pdf]
